# Supplementary material for: Adamantyl and homoadamantyl derivatives from Garcinia multiflora fruits
Source: Royal Society of Chemistry journal article supplement (doi:10.1039/c9ra01279f), 2019-01-01
Supplement: c9ra01279f1.pdf [file c9ra01279f1.pdf]

## **Adamantyl and homoadamantyl derivatives from *Garcinia multiflora* Fruits**

Yu Chen<sup>‡a</sup>, Ziyu Ma<sup>‡a</sup>, Haida Teng<sup>a</sup>, Fei Gan<sup>a</sup>, Hui Xiong<sup>b</sup>, Zhinan Mei<sup>b\*</sup>,

Guangzhong Yang<sup>b, c\*</sup>

<sup>a</sup> *College of Chemistry and Material Sciences, South-Central University for Nationalities, Wuhan 430074, P. R. China*

<sup>b</sup> *School of Pharmaceutical Sciences, South-Central University for Nationalities, Wuhan 430074, P. R. China*

<sup>c</sup> *National Demonstration Center for Experimental Ethnopharmacology Education (South-Central University for Nationalities), Wuhan 430074, P. R. China*

---

<sup>‡</sup> These authors contributed equally to this work.

\*Corresponding authors. Tel./fax: +86 27 6784 1196

E-mail address: meizhinan@163.com (Z. Mei); yanggz888@126.com (G. Yang)

## **Electronic Supplementary Information**

- 1. Spectra of compound 1**
- 2. Spectra of compound 2**
- 3. Spectra of compound 3**
- 4. Spectra of compound 4**
- 5. Spectra of compounds 5 and 6**
- 6. Spectra of compound 7**
- 7. Spectra of compound 8**
- 8. Spectra of compound 9**

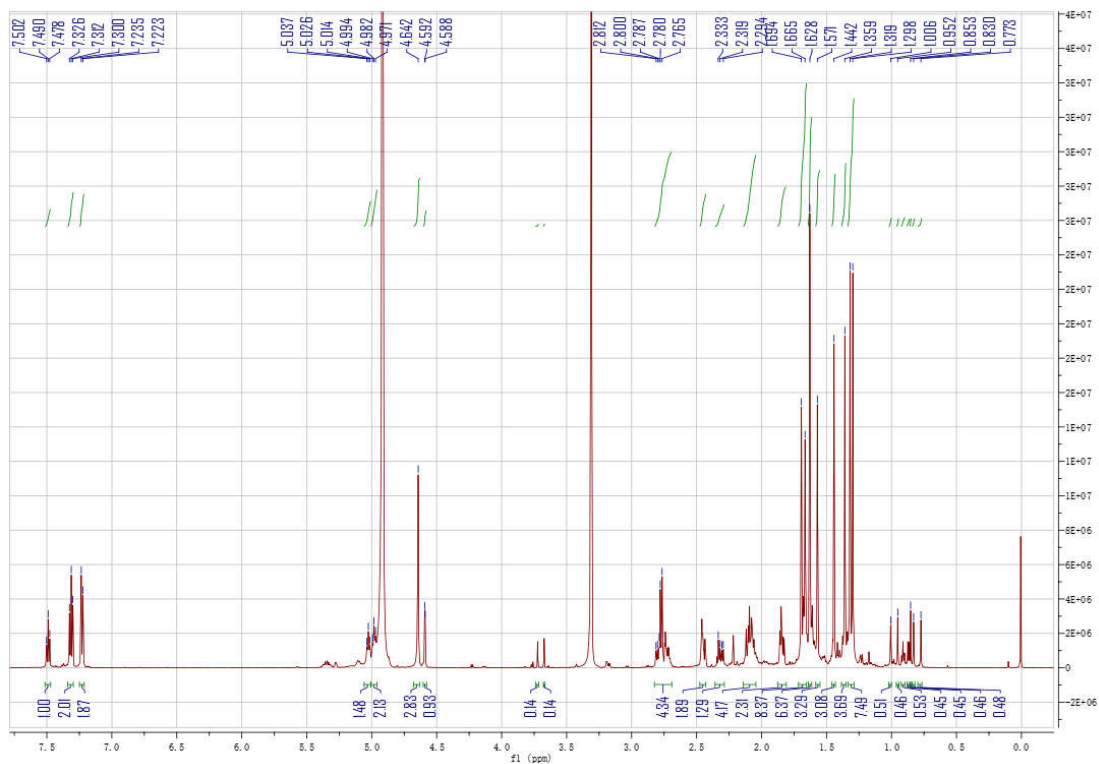

Fig 1. The  $^1\text{H-NMR}$  spectrum of 1

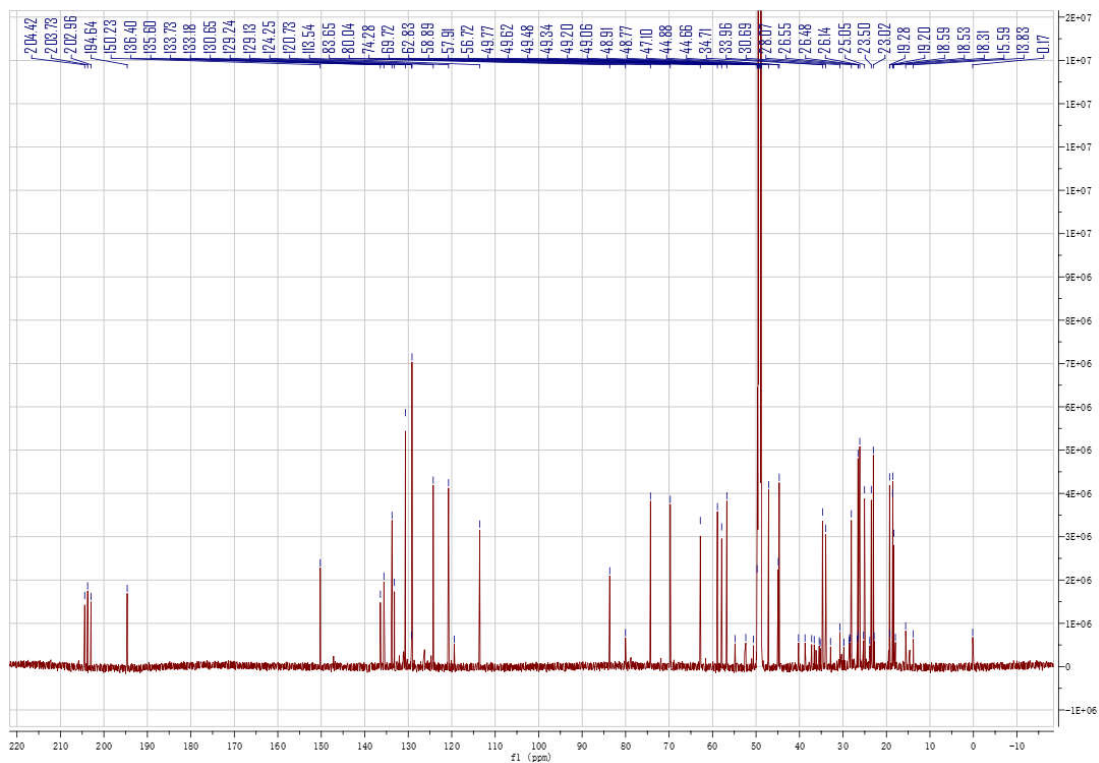

Fig 2. The  $^{13}\text{C-NMR}$  spectrum of 1

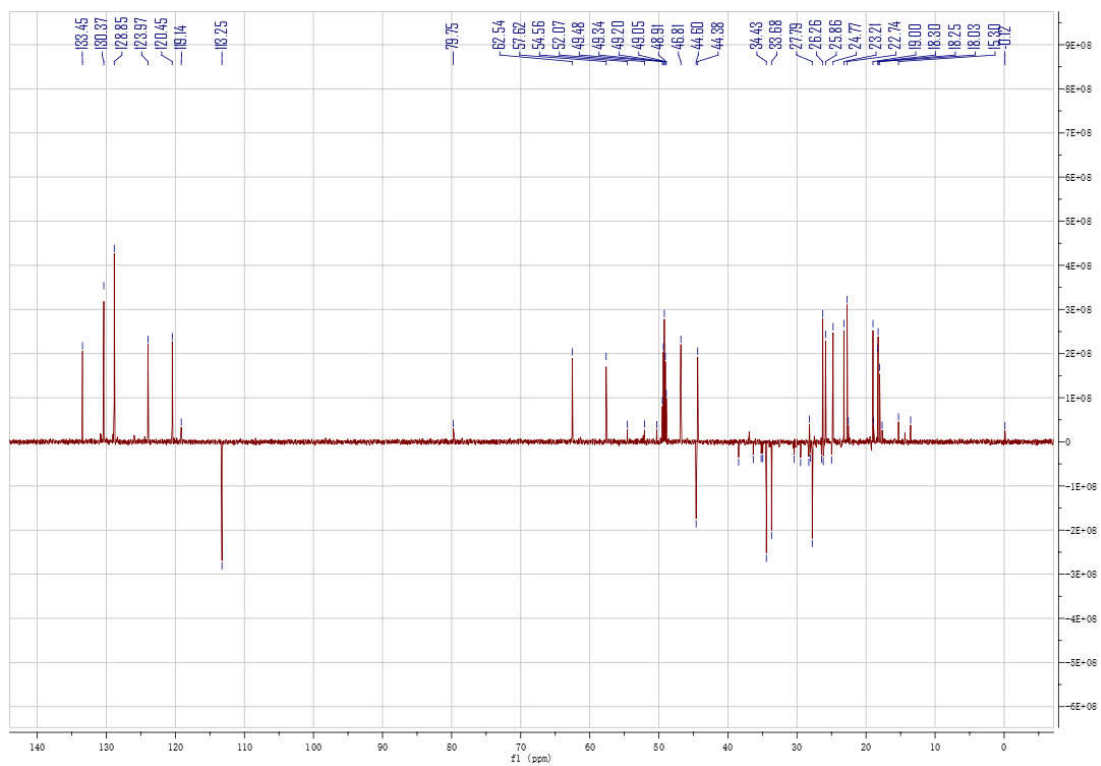

Fig 3.  $^{13}\text{C}$ -NMR-DEPT spectrum of 1

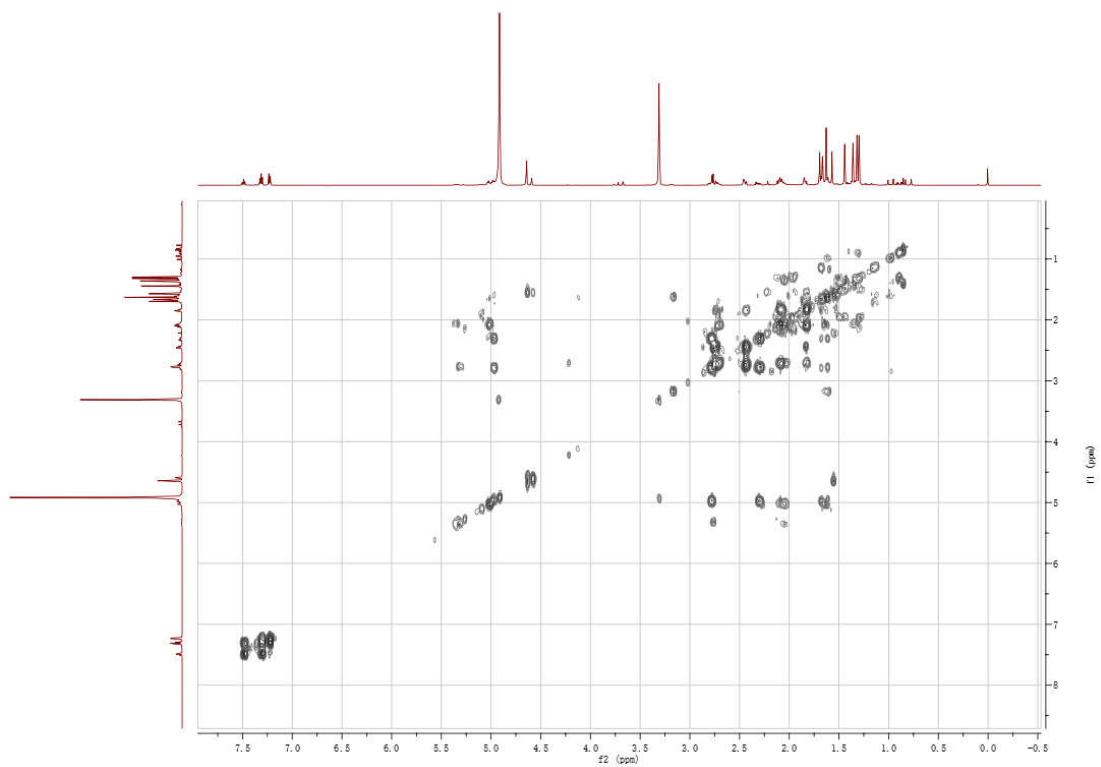

Fig 4.  $^1\text{H}$ - $^1\text{H}$  COSY spectrum of 1

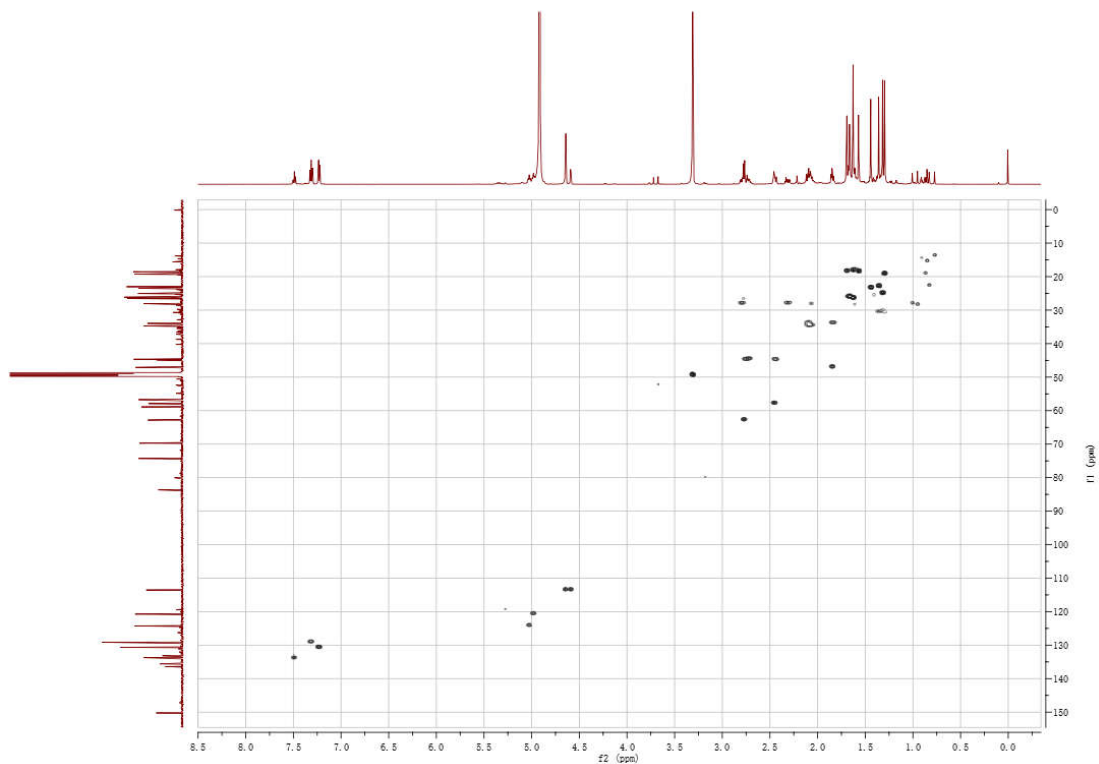

**Fig 5. HSQC spectrum of 1**

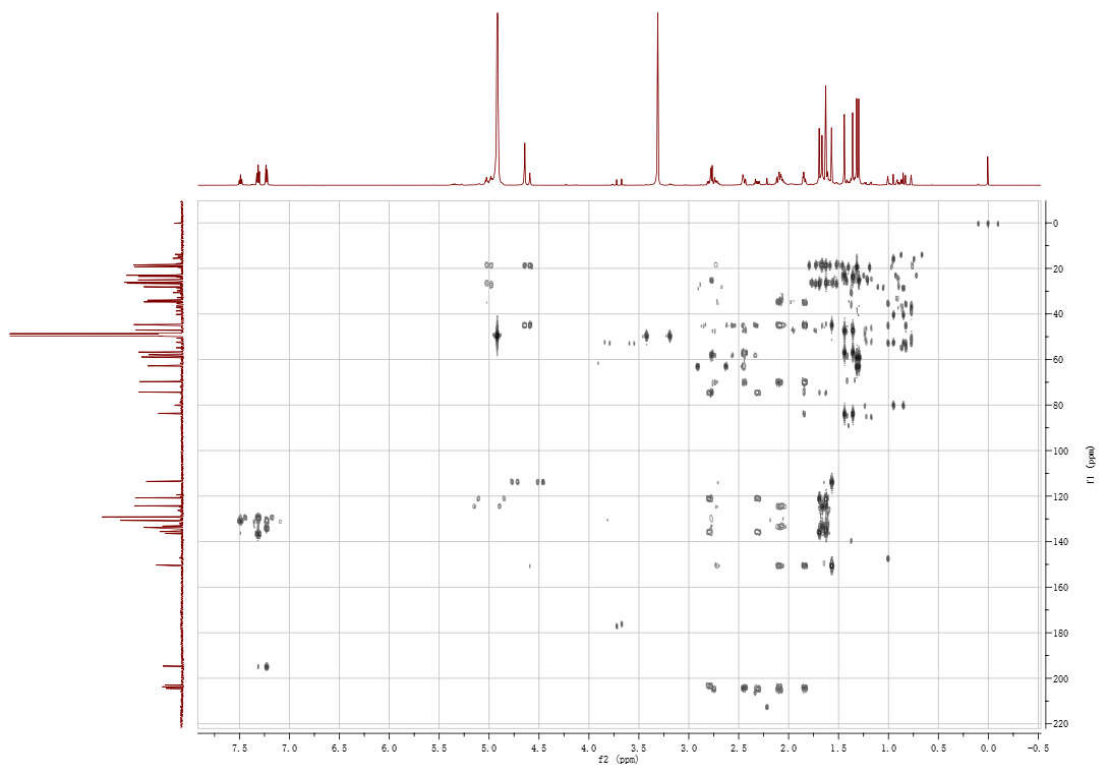

**Fig 6. HMBC spectrum of 1**

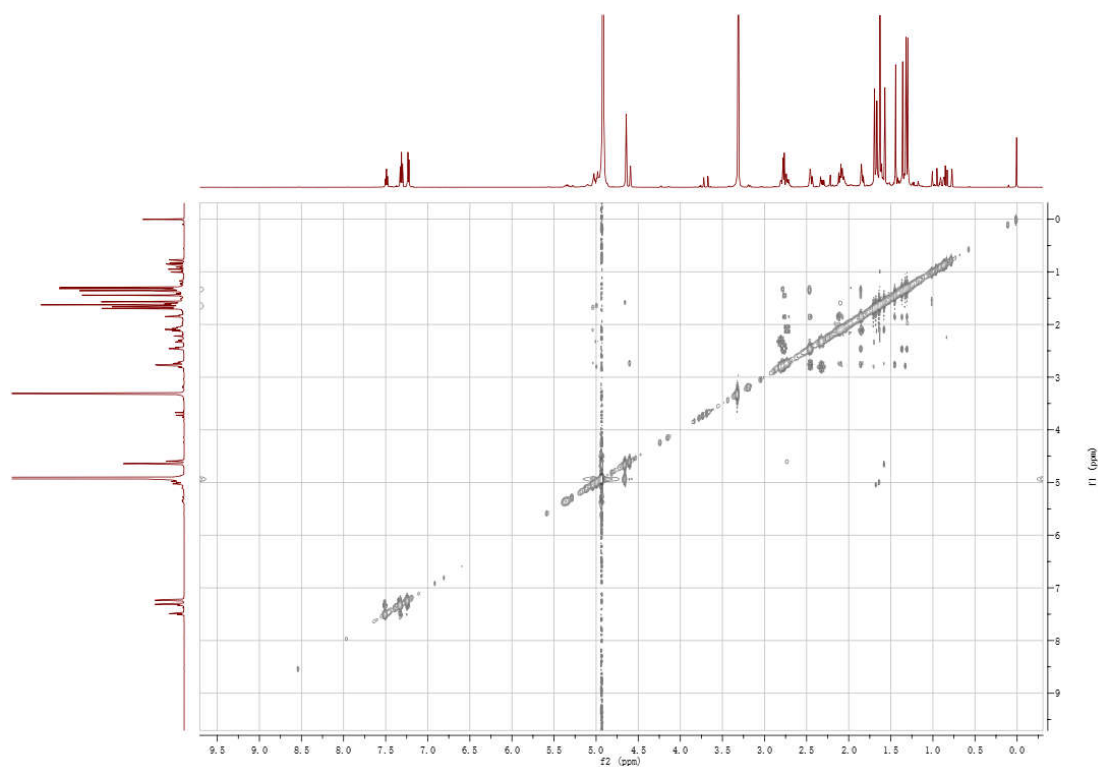

**Fig 7. ROESY spectrum of 1**

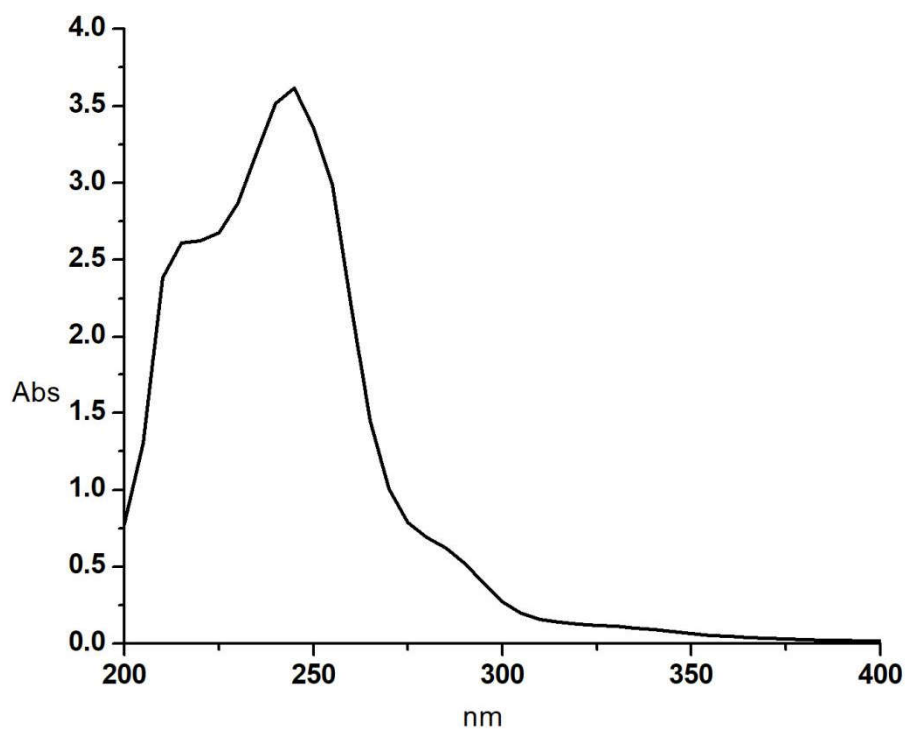

**Fig 8. UV spectrum of 1**

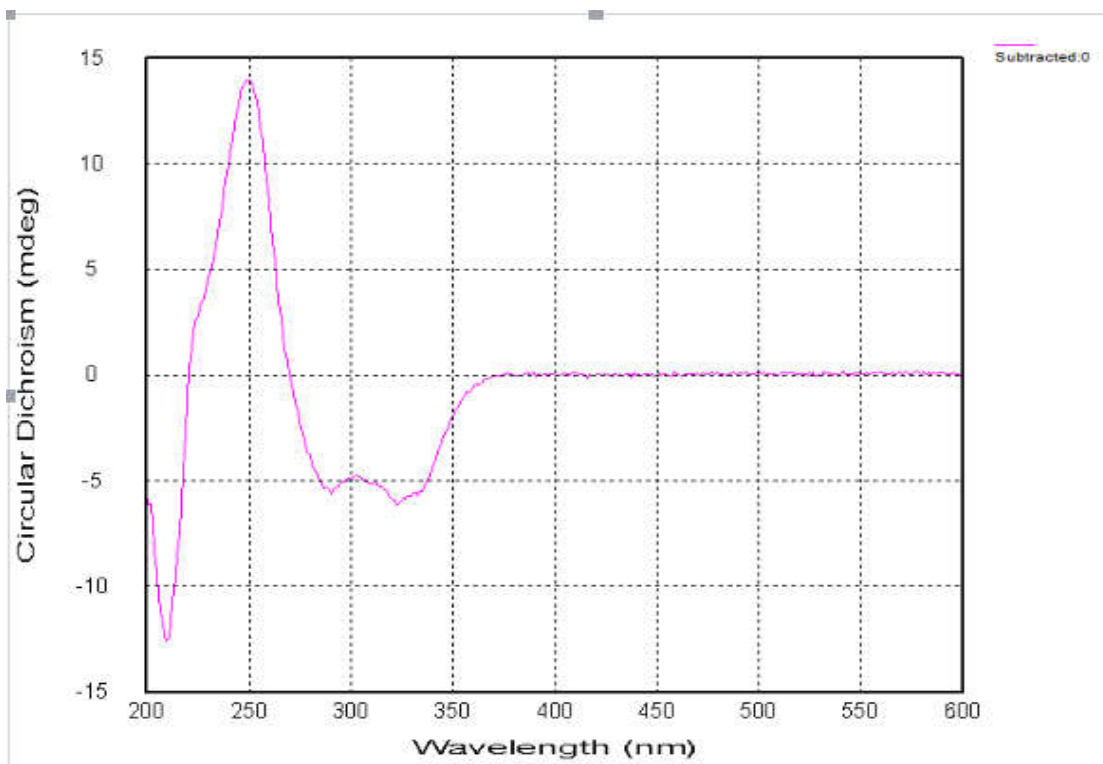

**Fig 9. CD spectrum of 1**

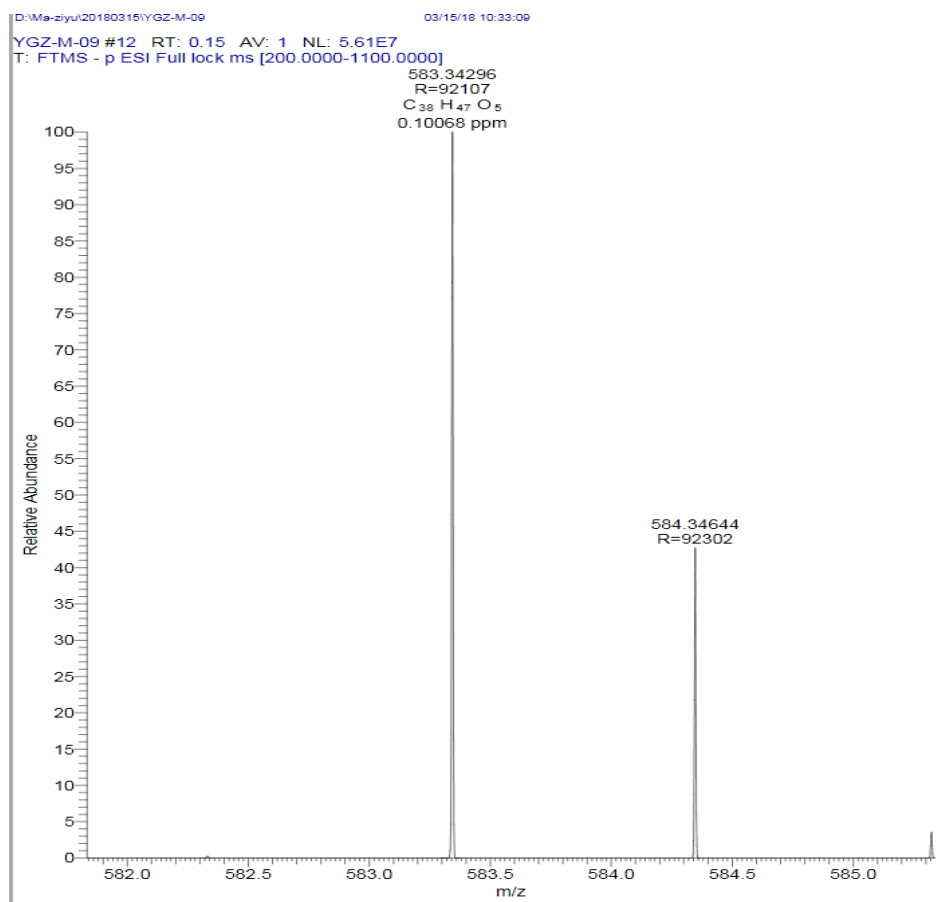

**Fig 10. HR-ESI-MS of 1**

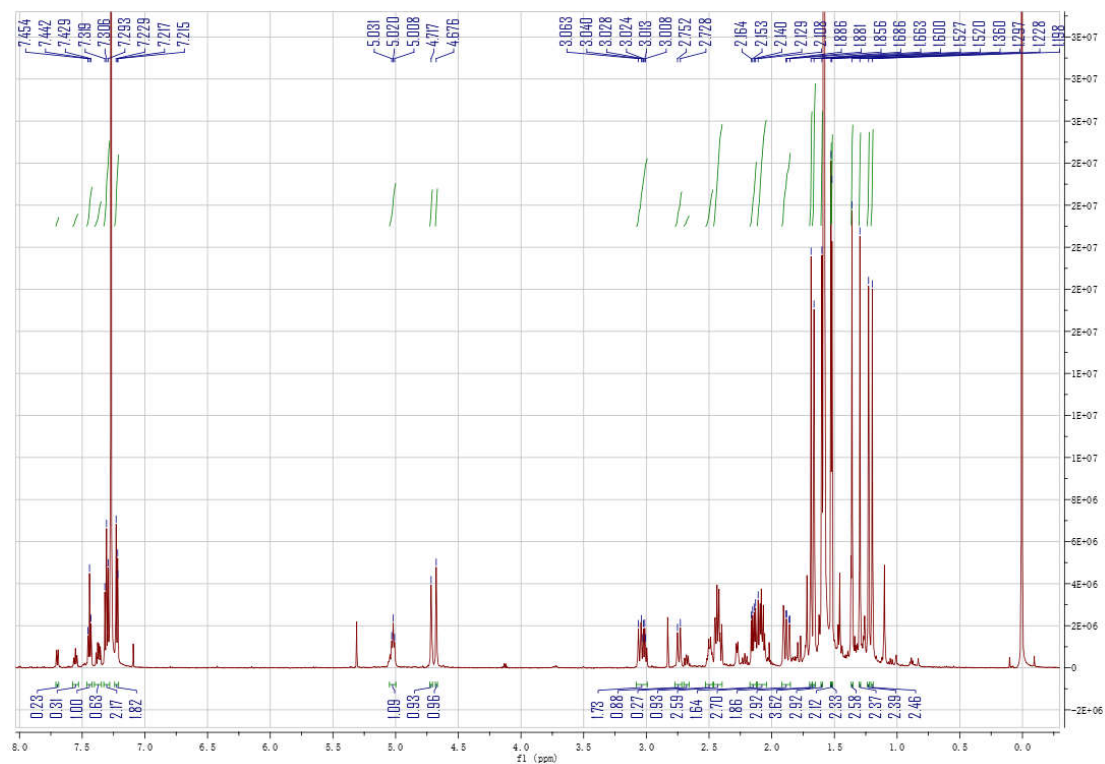

Fig 11. The  $^1\text{H}$ -NMR spectrum of 2

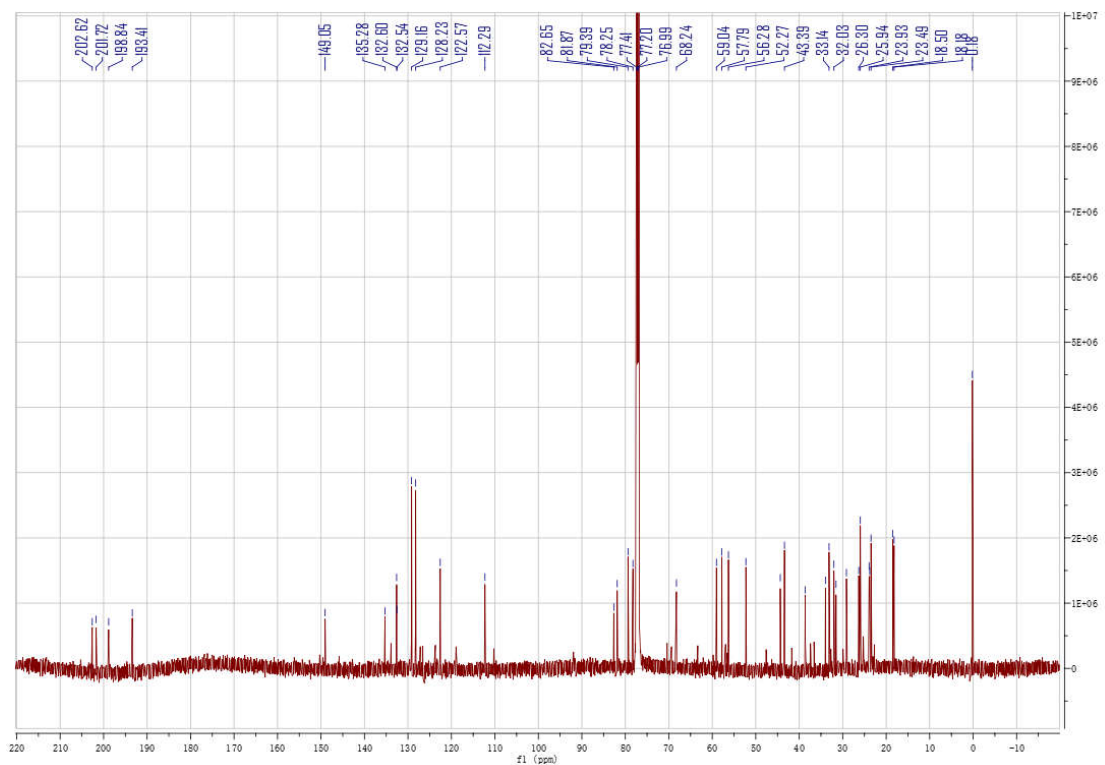

Fig 12. The  $^{13}\text{C}$ -NMR spectrum of 2



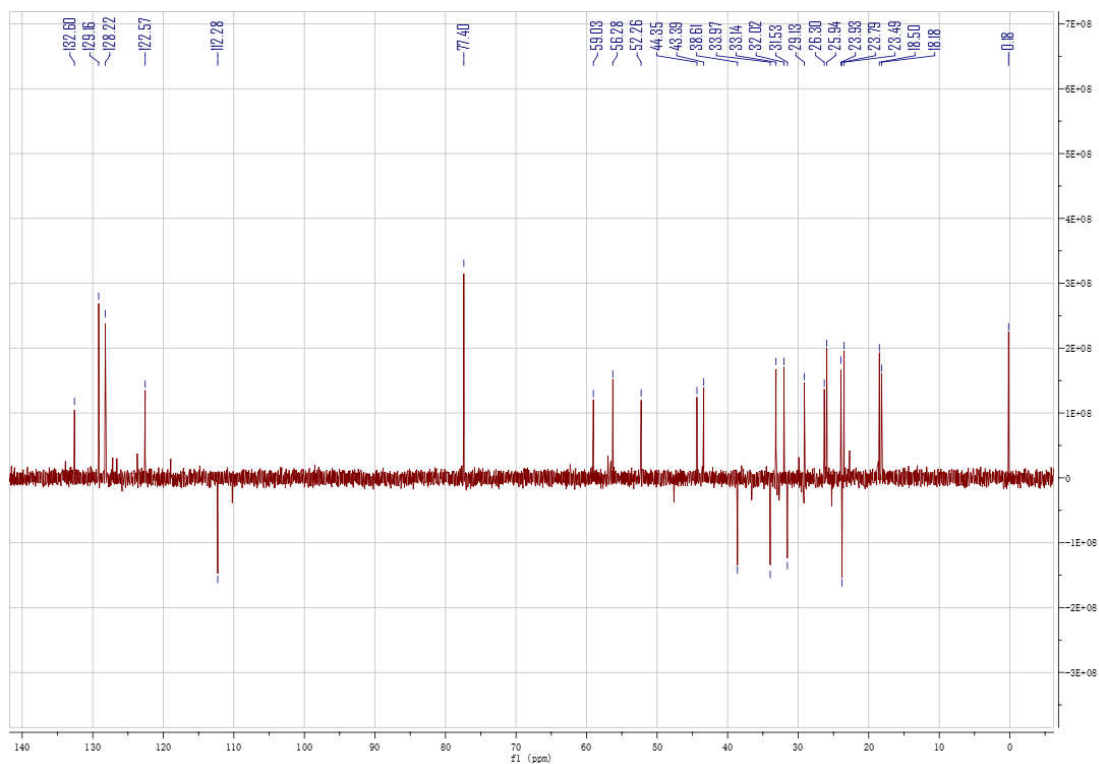

Fig 13.  $^{13}\text{C}$ -NMR-DEPT spectrum of 2

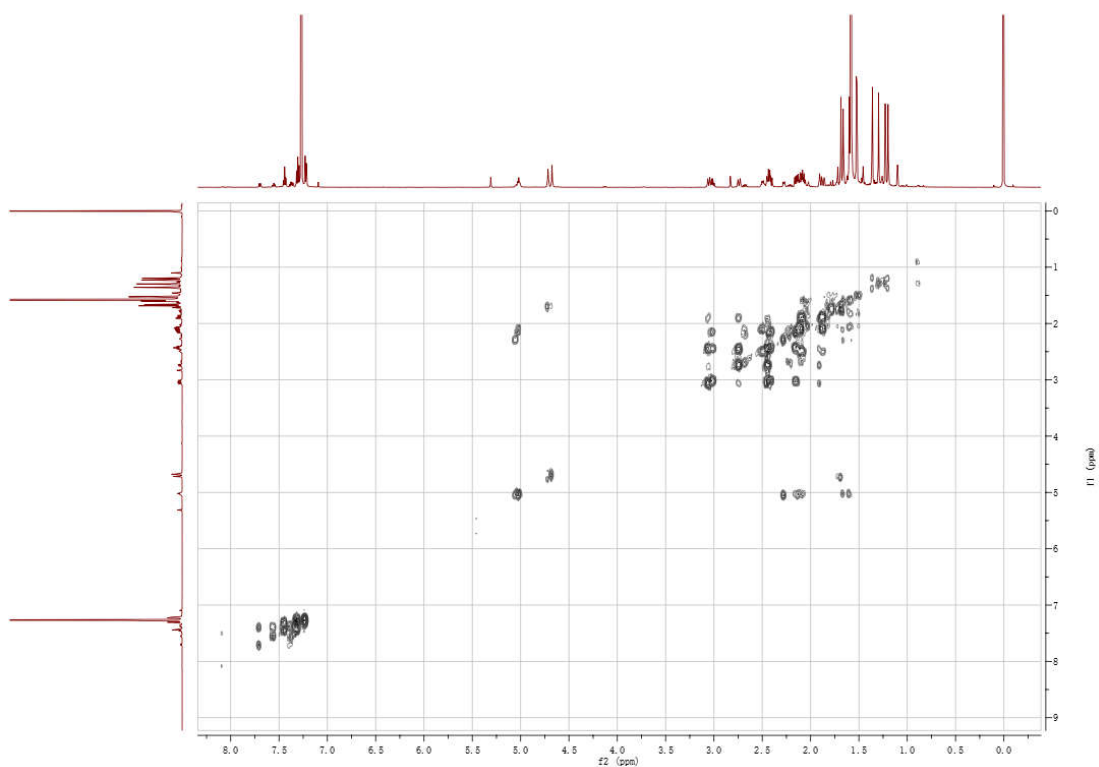

Fig 14.  $^1\text{H}$ - $^1\text{H}$  COSY spectrum of 2

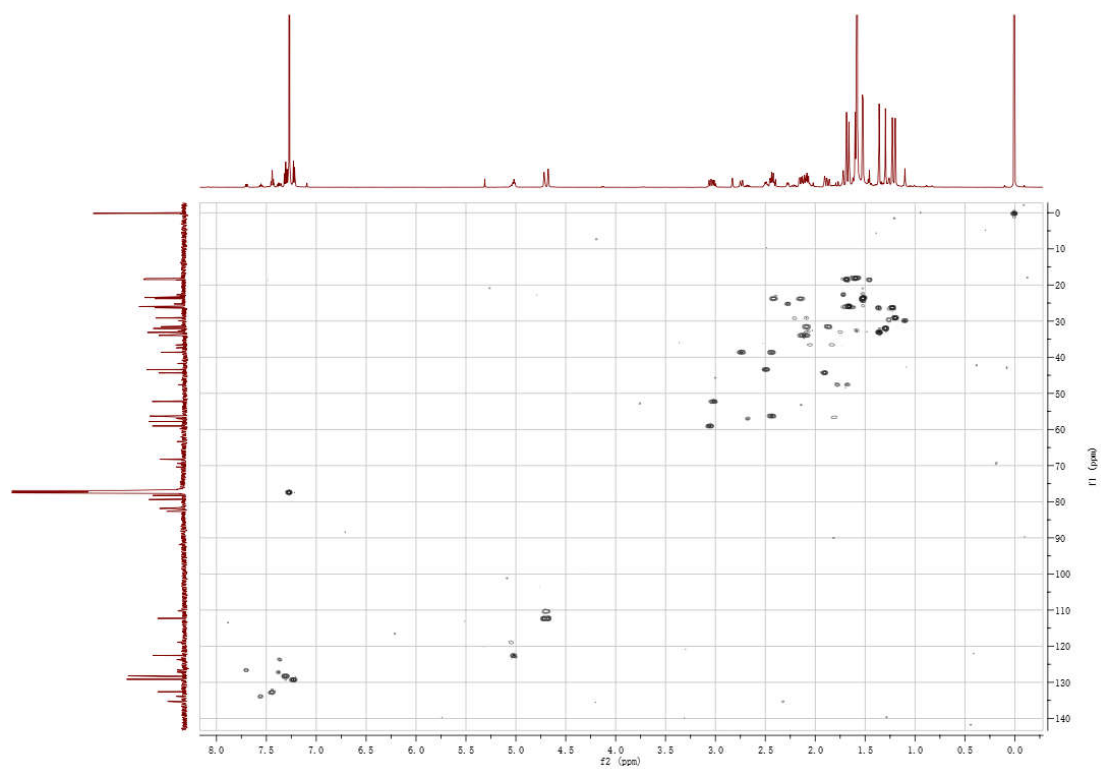

**Fig 15. HSQC spectrum of 2**

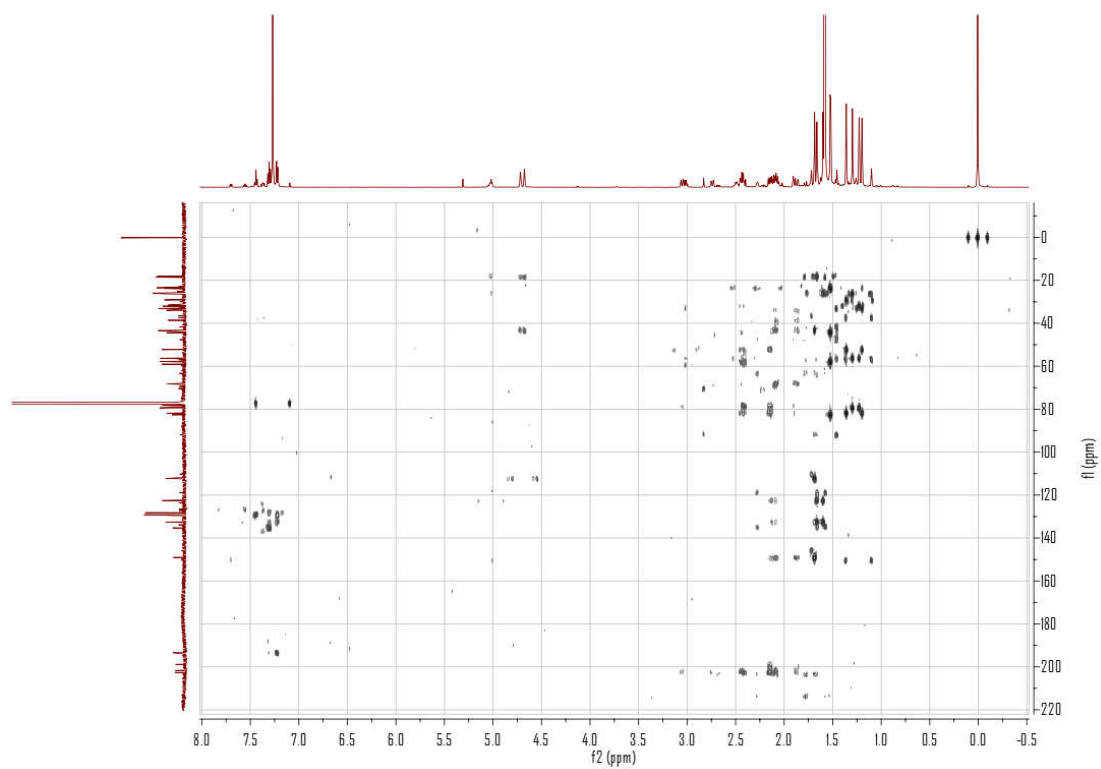

**Fig 16. HMBC spectrum of 2**

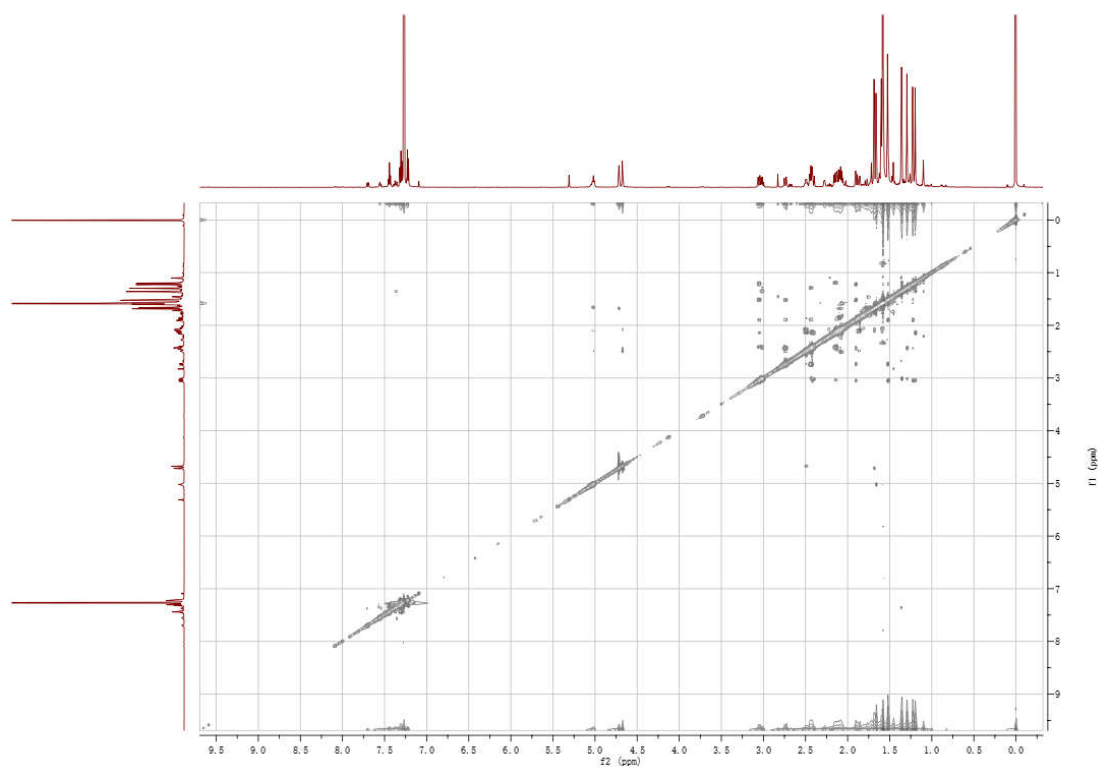

**Fig 17. ROESY spectrum of 2**

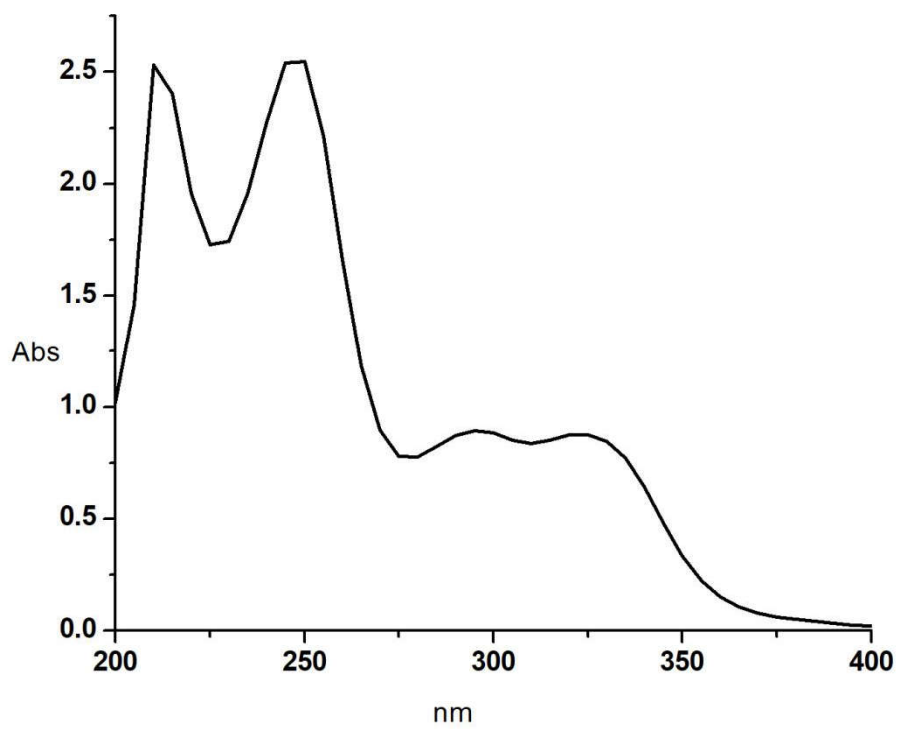

**Fig 18. UV spectrum of 2**

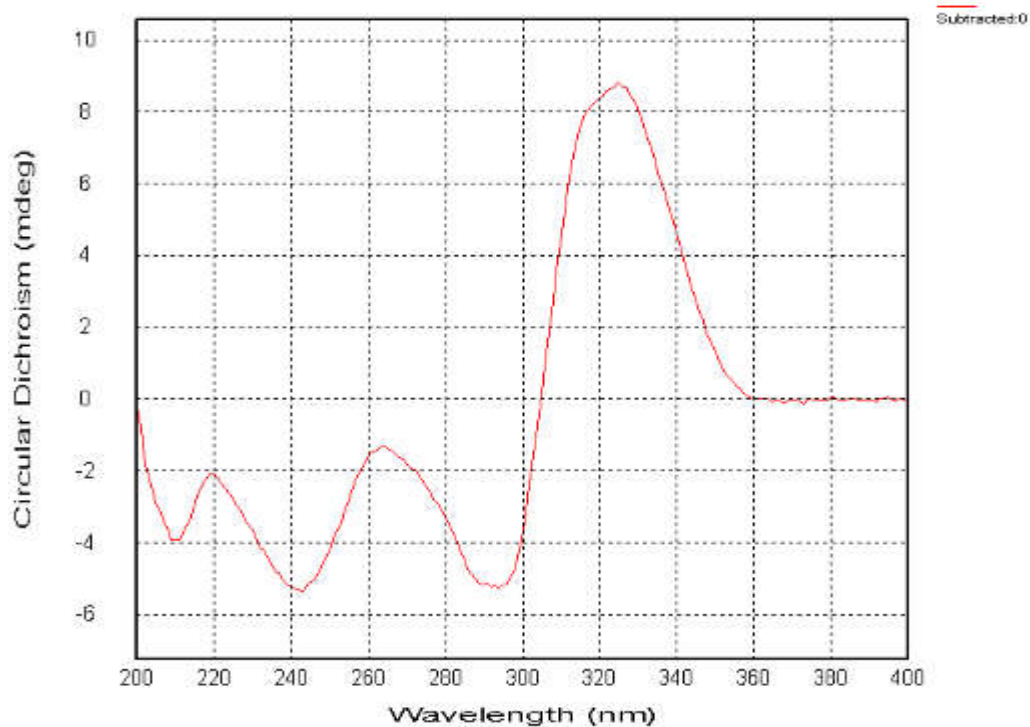

**Fig 19. CD spectrum of 2**

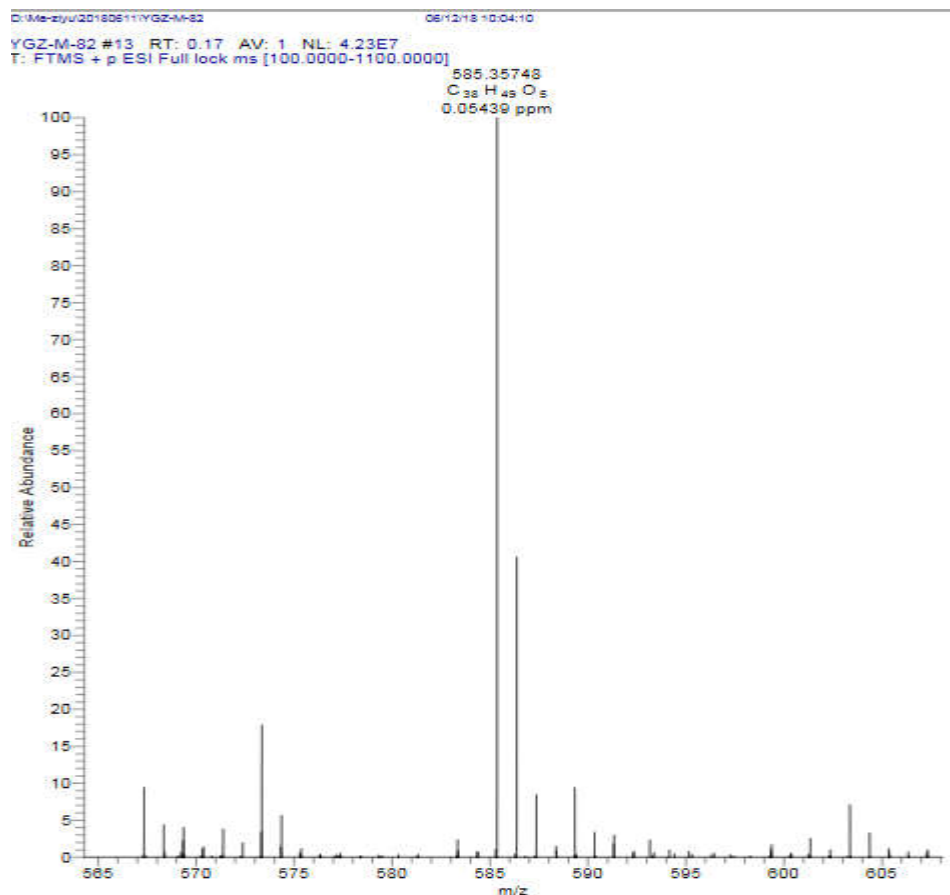

**Fig 20. HR-ESI-MS of 2**

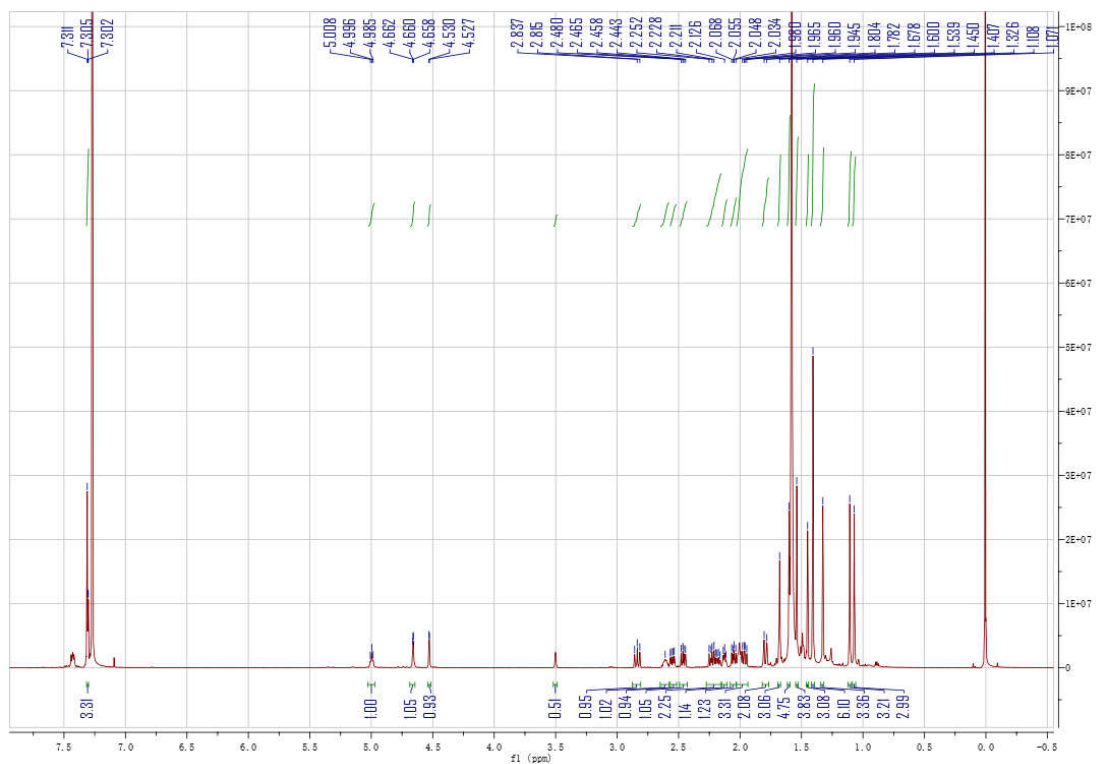

Fig 21. The  $^1\text{H}$ -NMR spectrum of 3

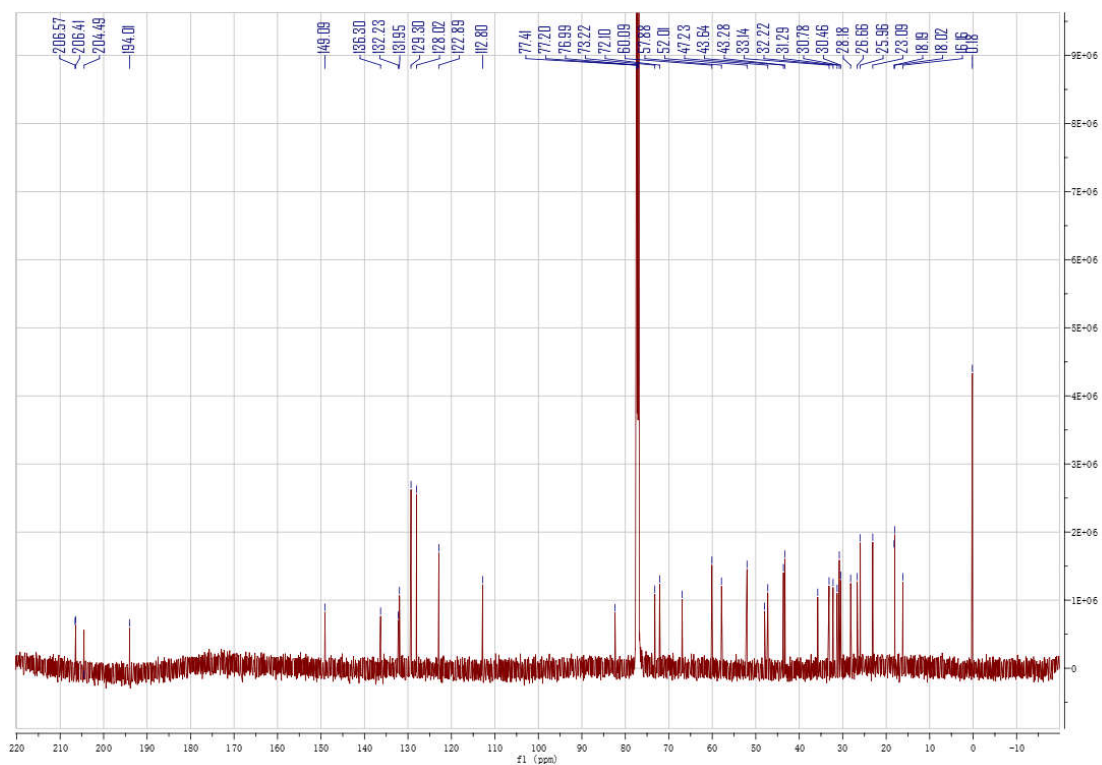

Fig 22. The  $^{13}\text{C}$ -NMR spectrum of 3

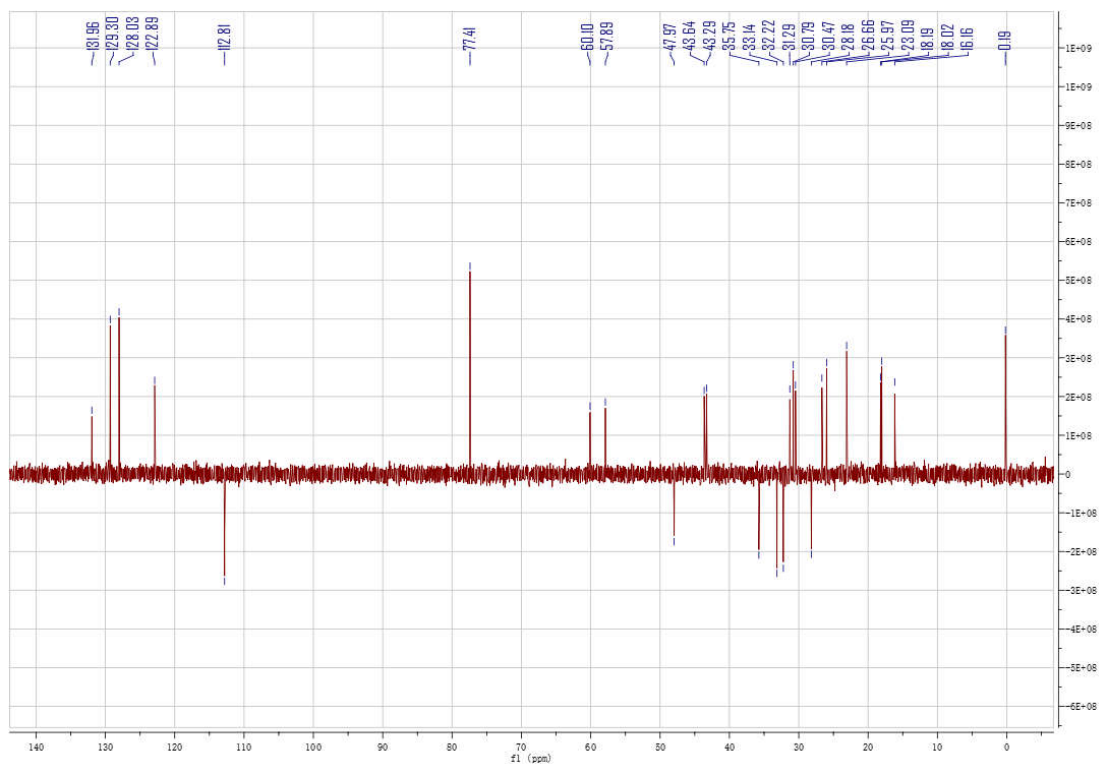

Fig 23.  $^{13}\text{C}$ -NMR-DEPT spectrum of 3

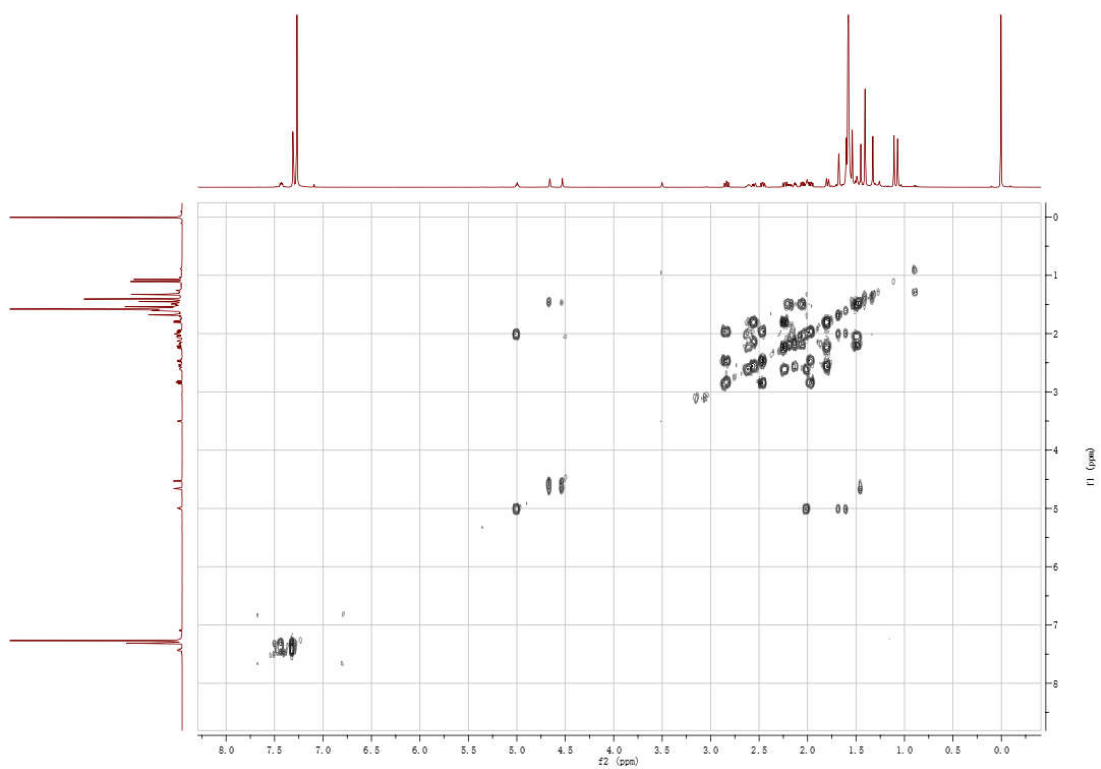

Fig 24.  $^1\text{H}$ - $^1\text{H}$  COSY spectrum of 3

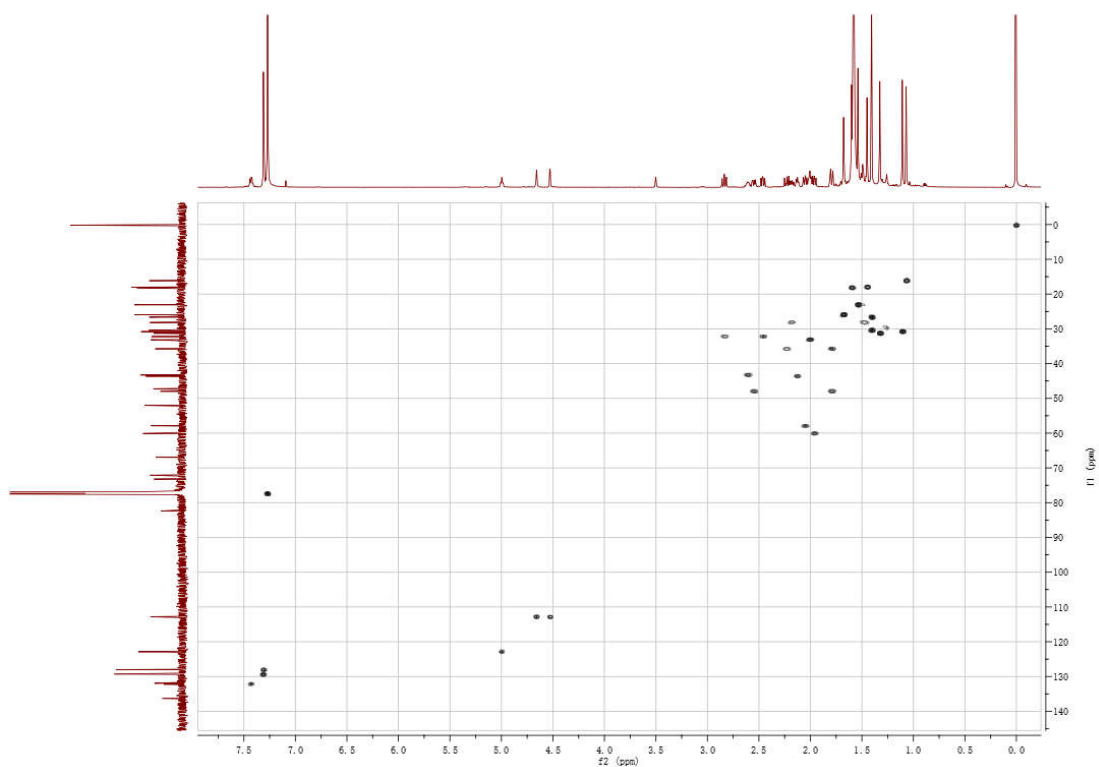

**Fig 25. HSQC spectrum of 3**

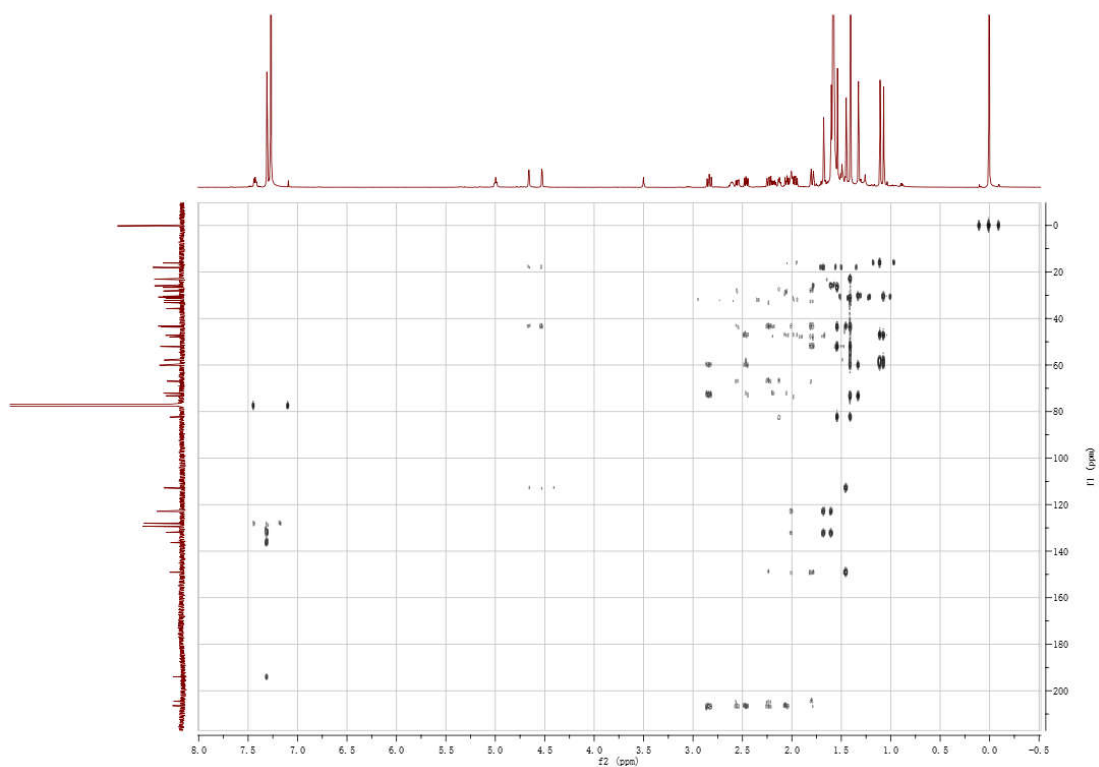

**Fig 26. HMBC spectrum of 3**

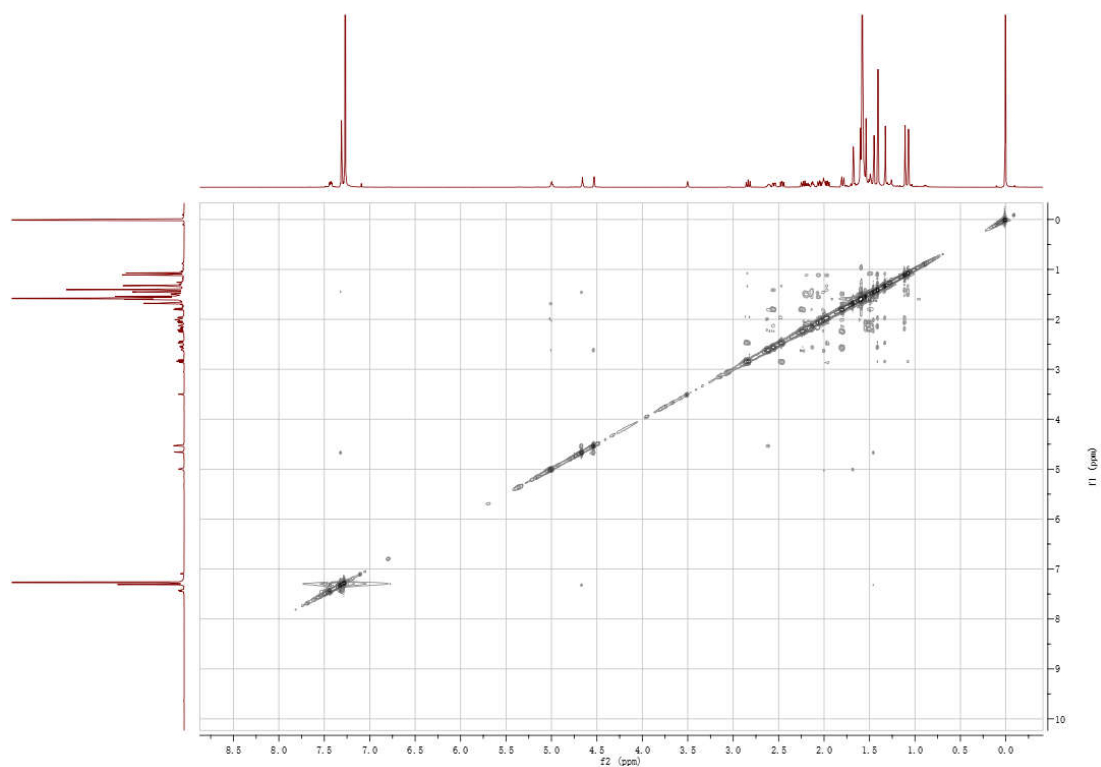

**Fig 27. ROESY spectrum of 3**

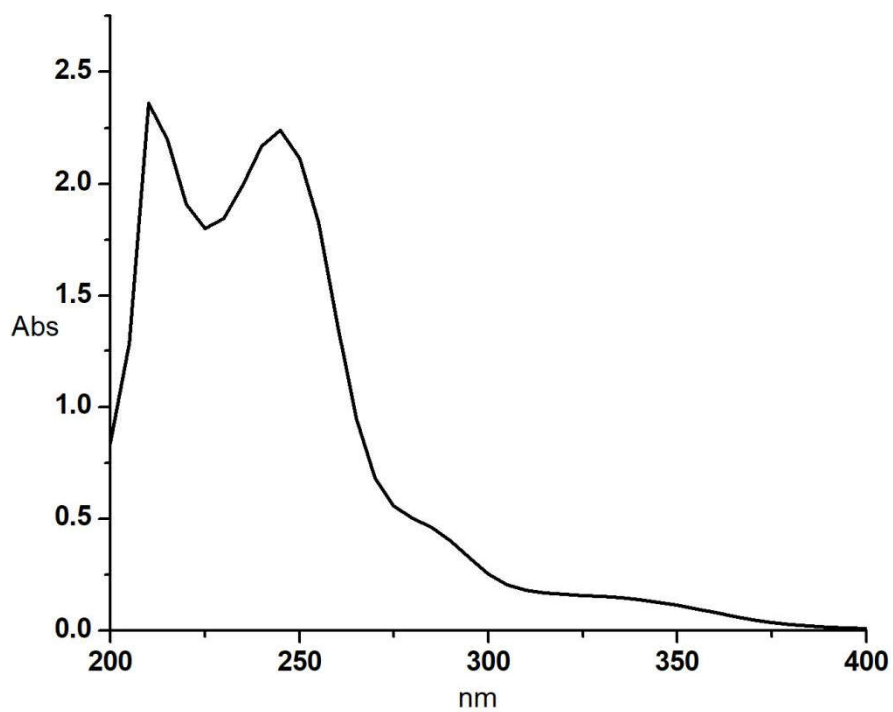

**Fig 28. UV spectrum of 3**



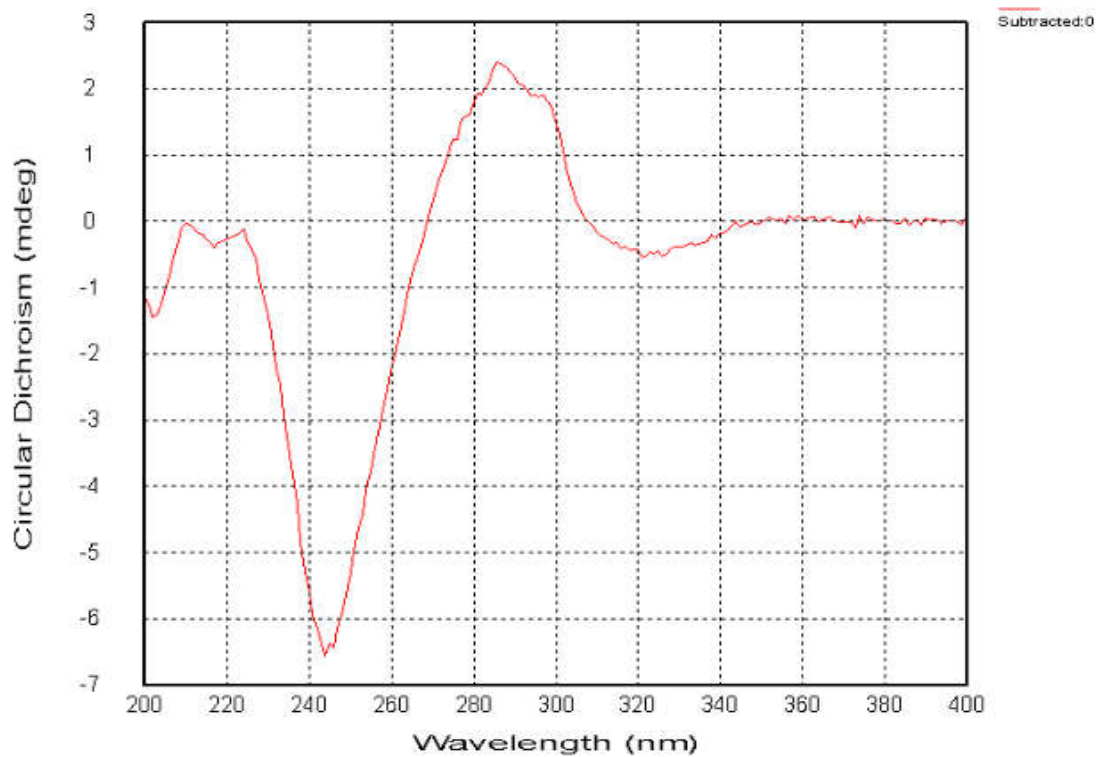

Fig 29. CD spectrum of 3

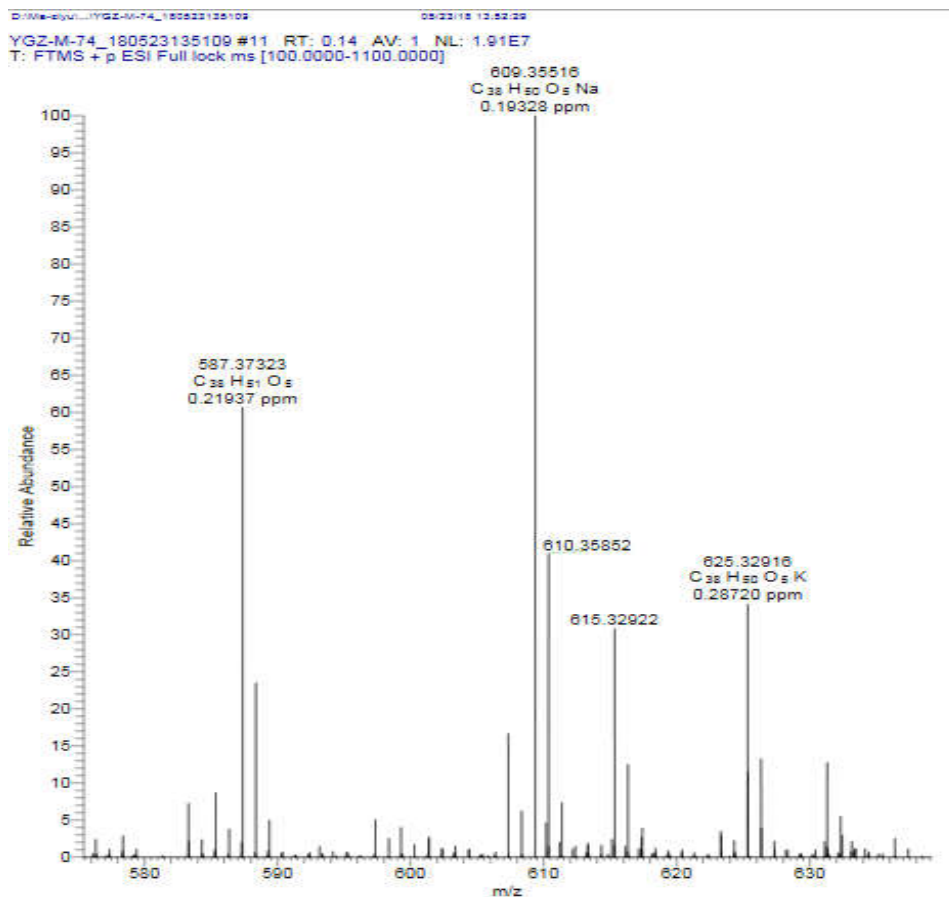

Fig 30. HR-ESI-MS of 3

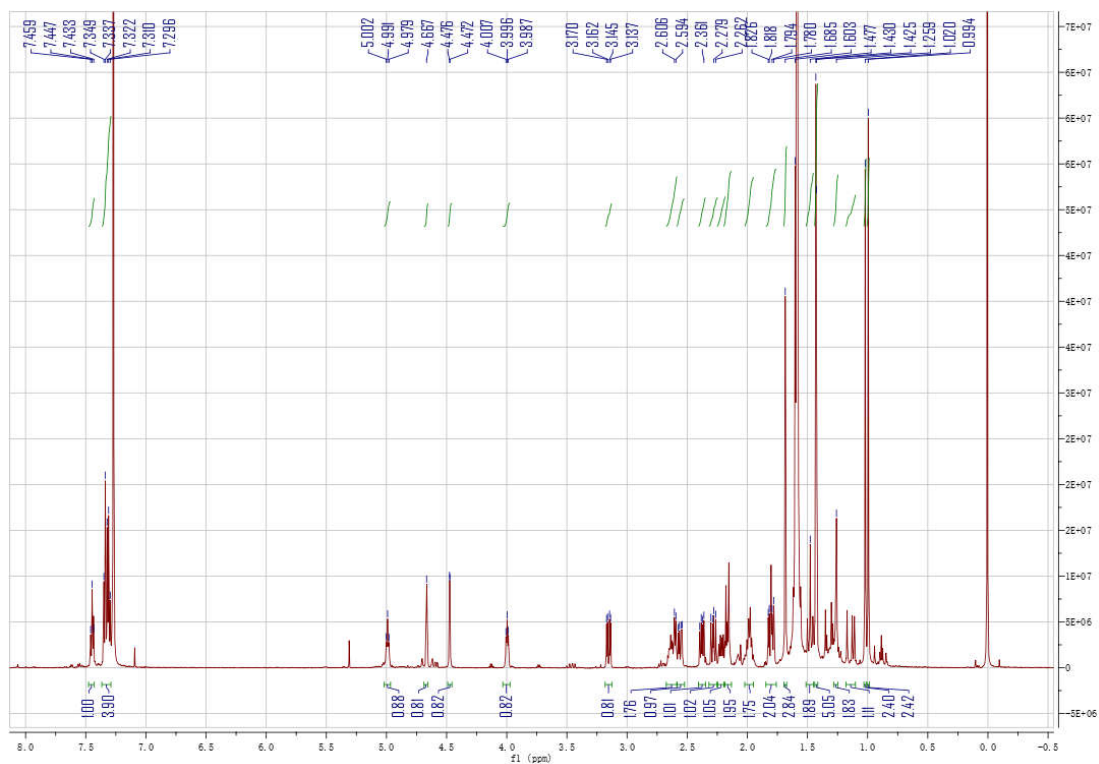

Fig 31. The  $^1\text{H}$ -NMR spectrum of 4

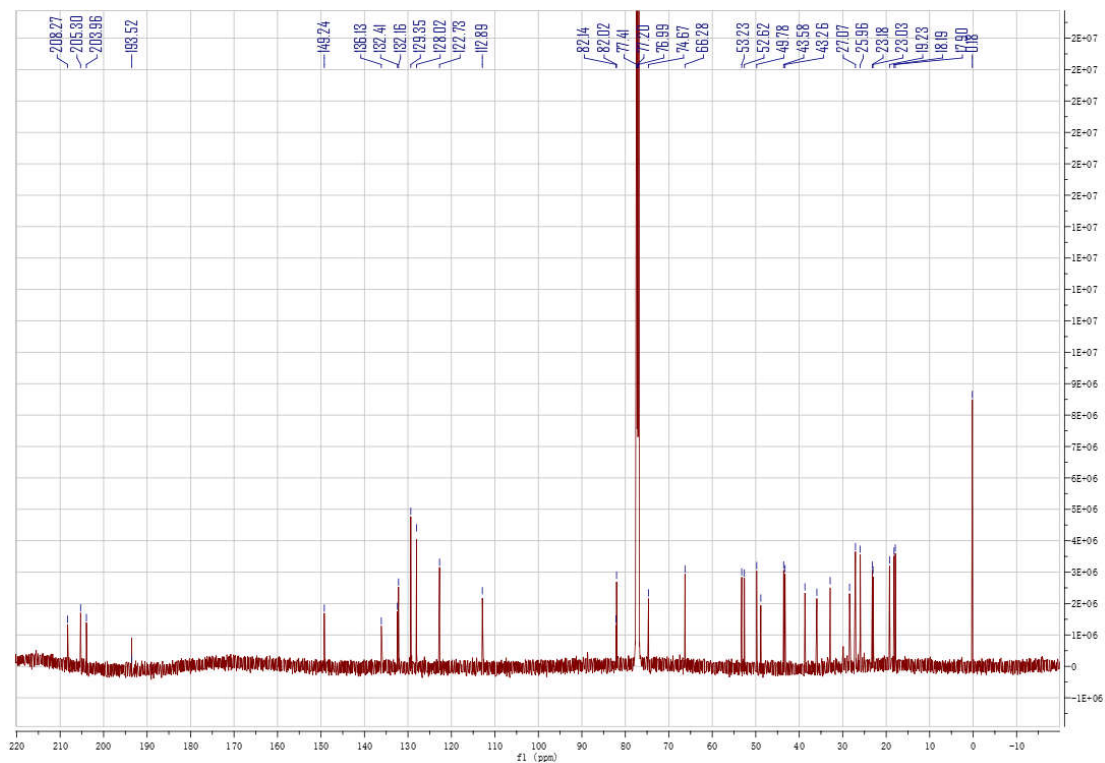

Fig 32. The  $^{13}\text{C}$ -NMR spectrum of 4

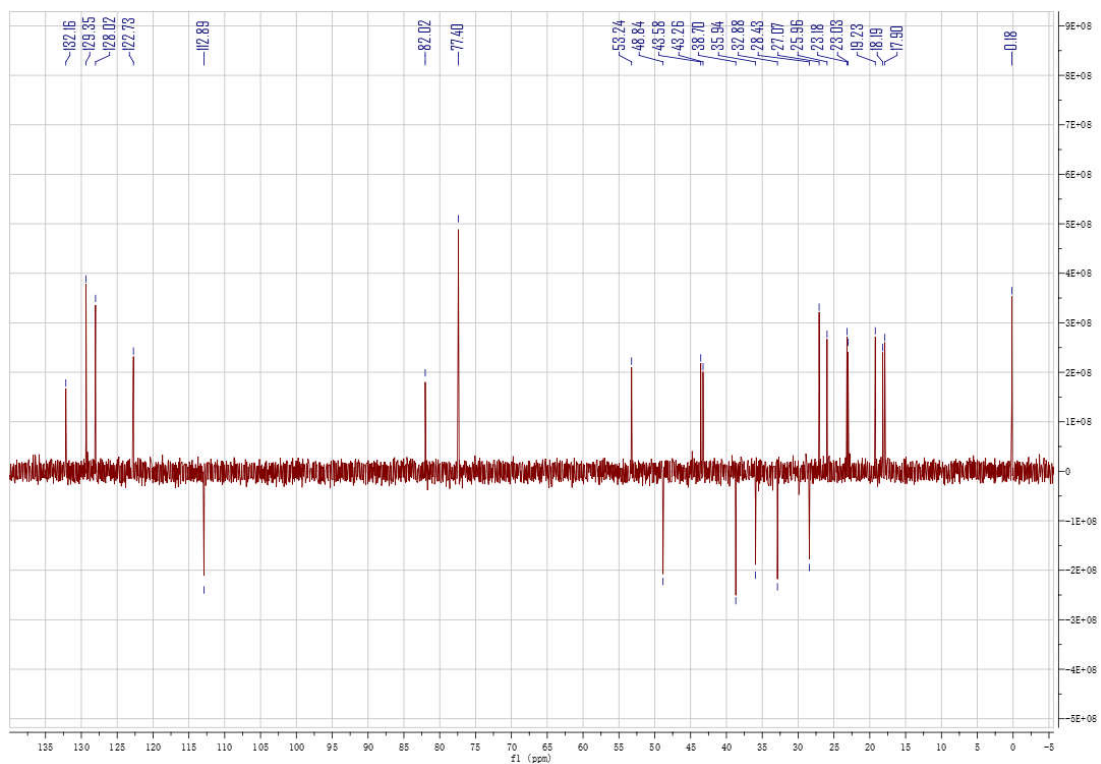

Fig 33.  $^{13}\text{C}$ -NMR-DEPT spectrum of 4

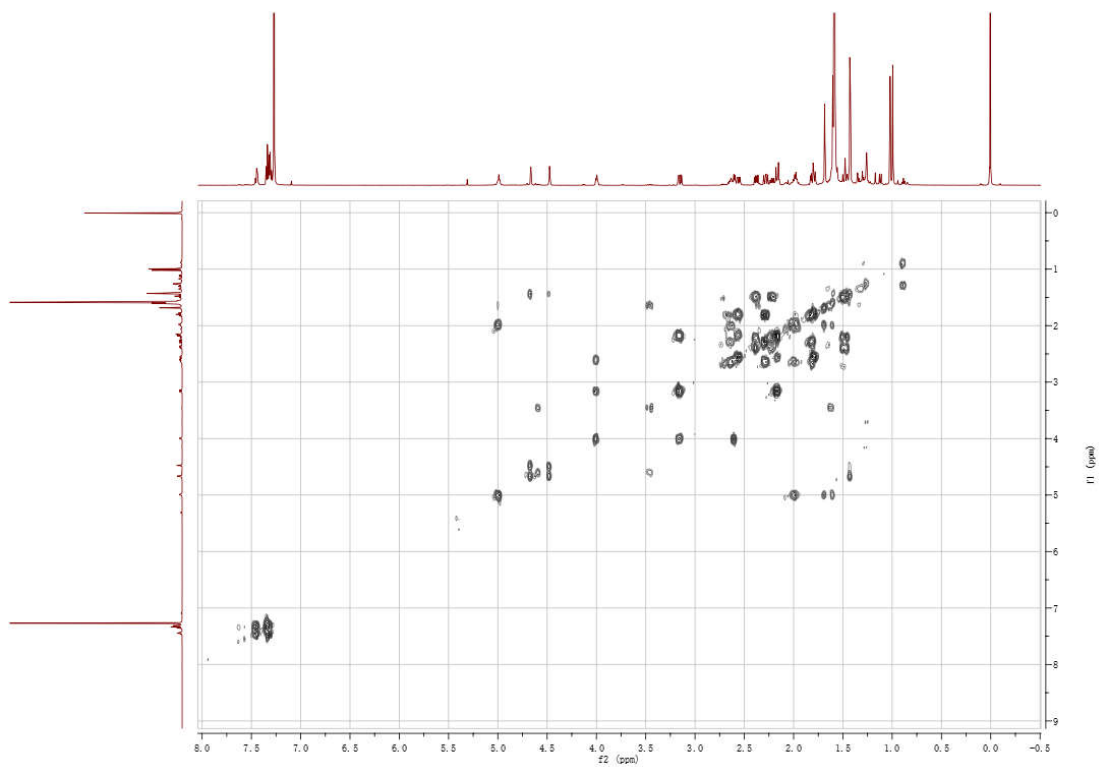

Fig 34.  $^1\text{H}$ - $^1\text{H}$  COSY spectrum of 4

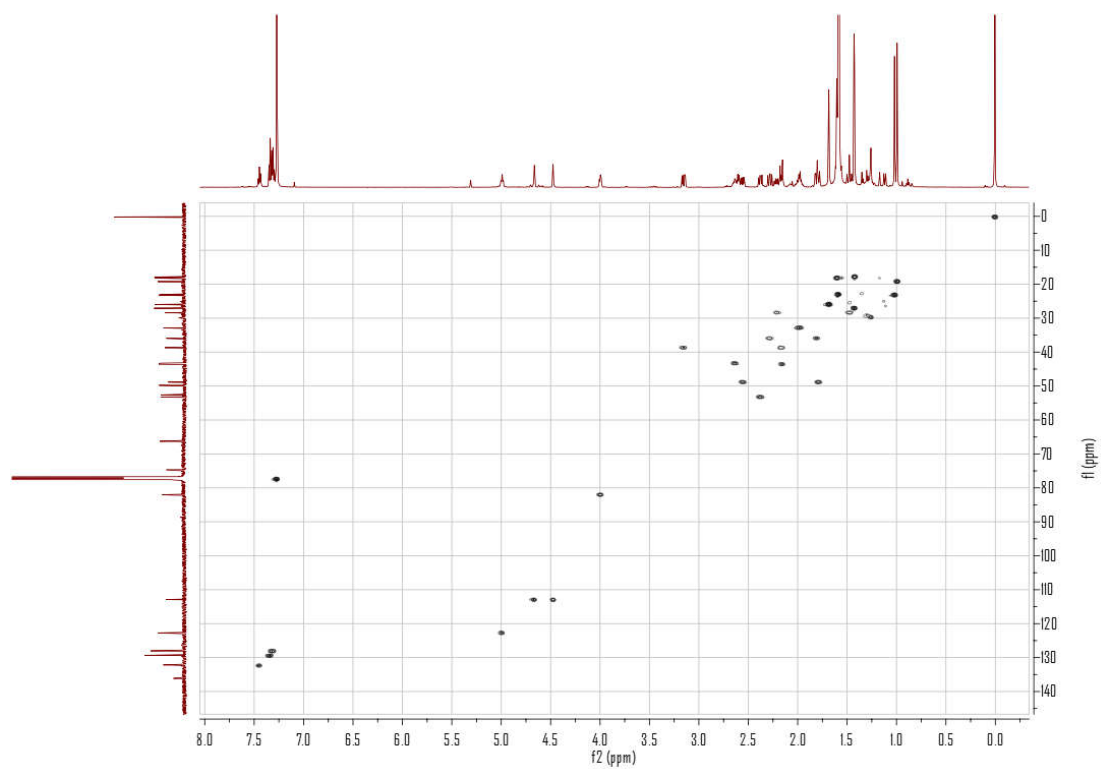

**Fig 35. HSQC spectrum of 4**

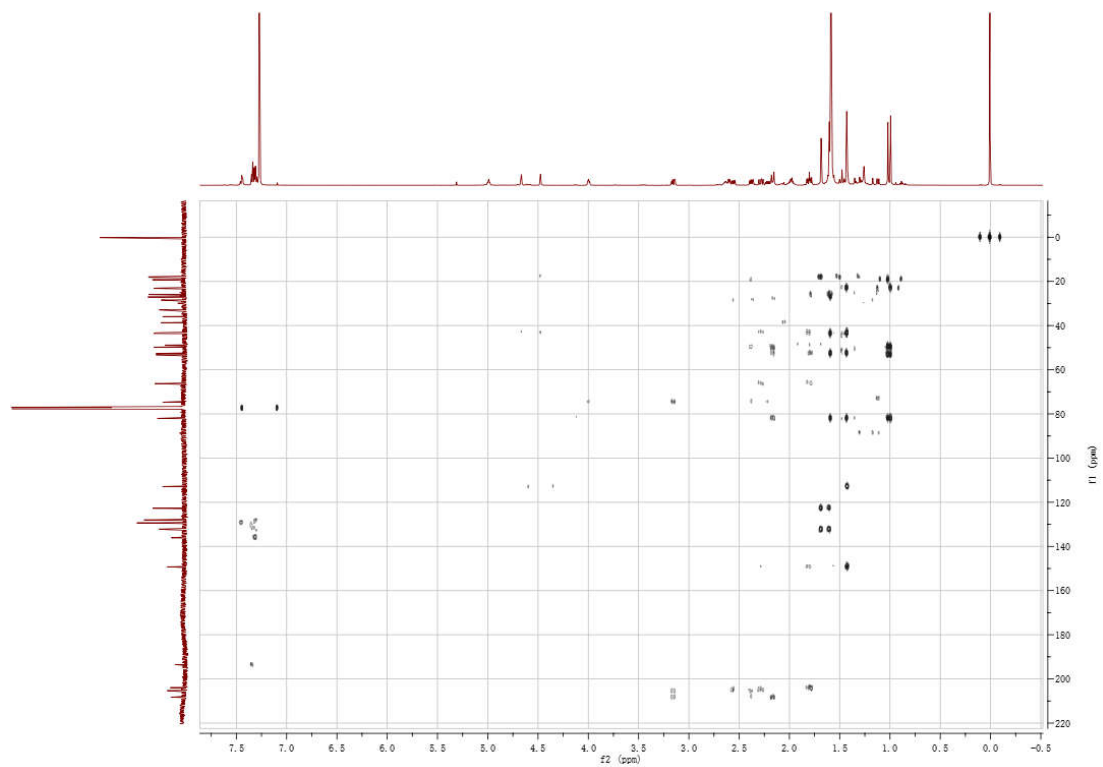

**Fig 36. HMBC spectrum of 4**

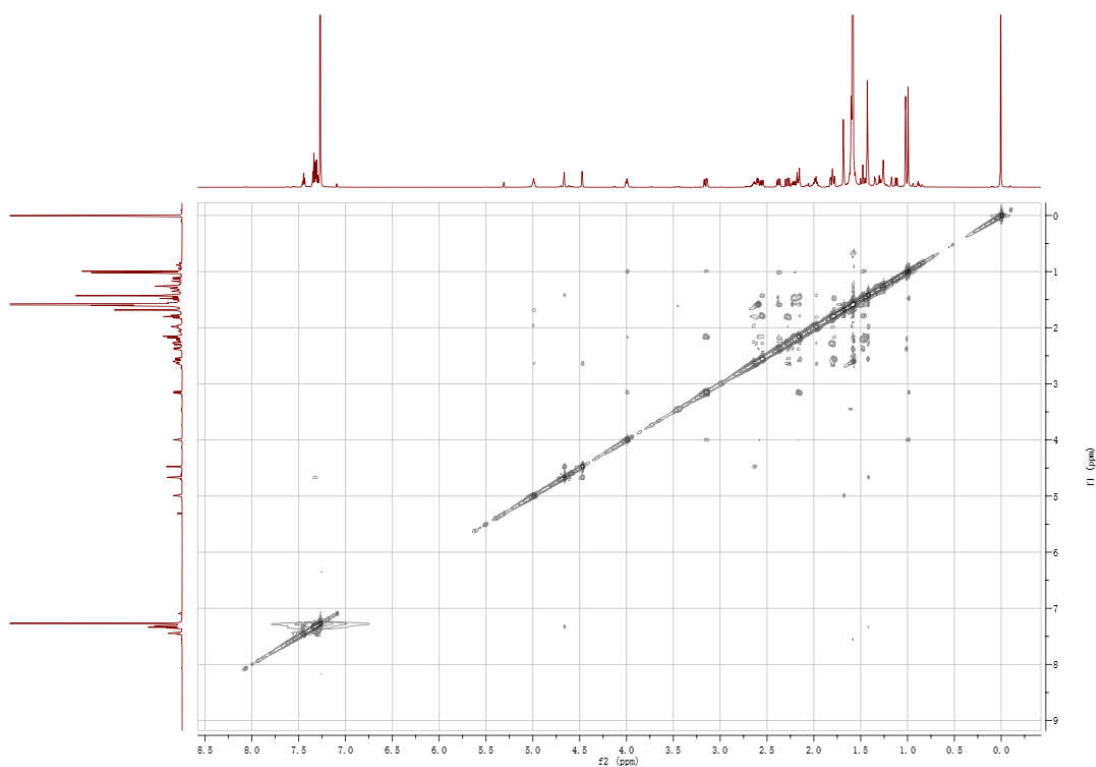

**Fig 37. ROESY spectrum of 4**

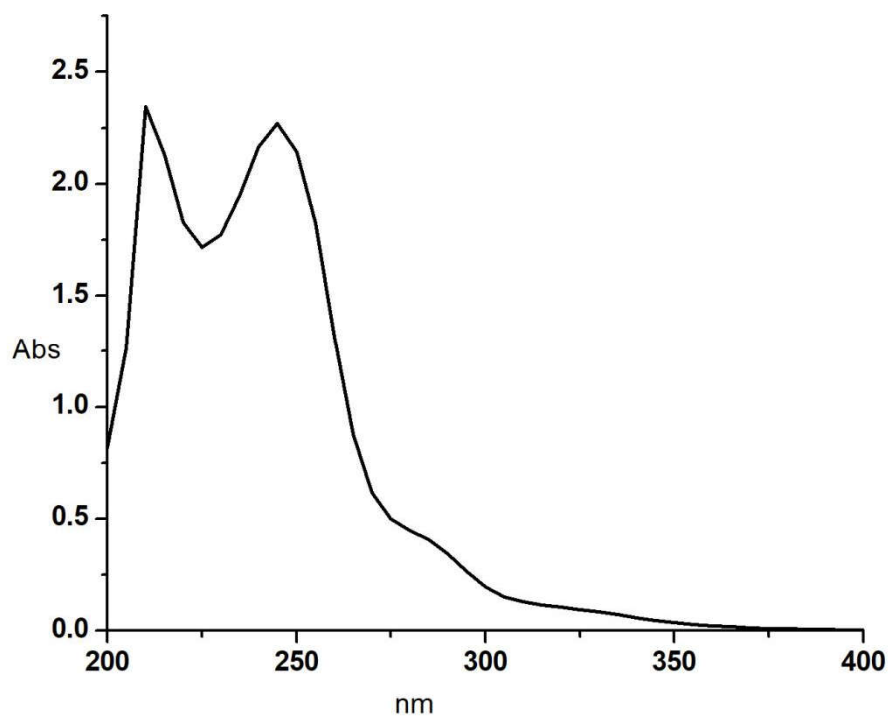

**Fig 38. UV spectrum of 4**

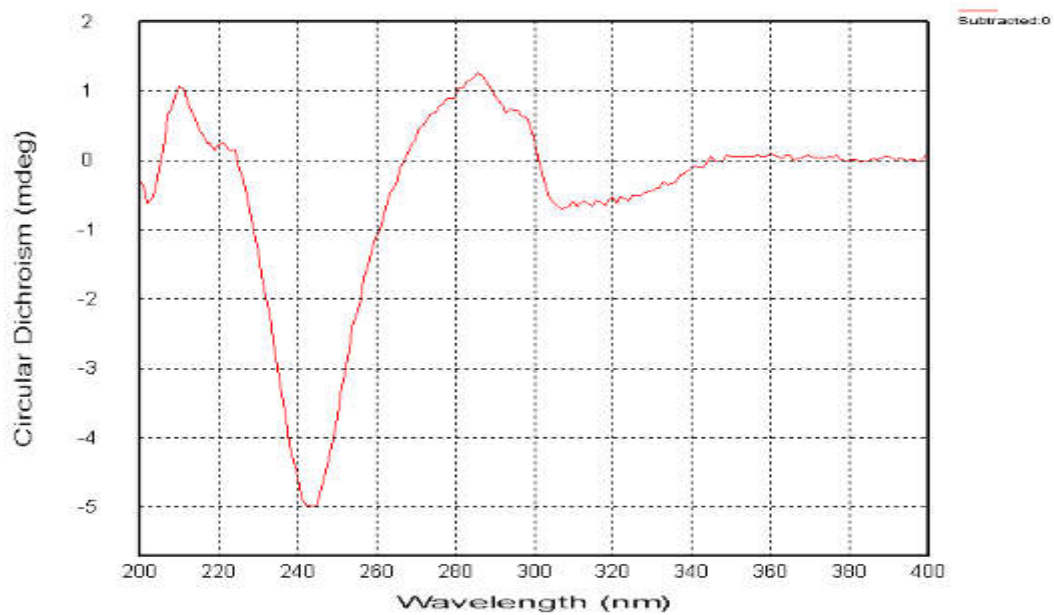

**Fig 39. CD spectrum of 4**

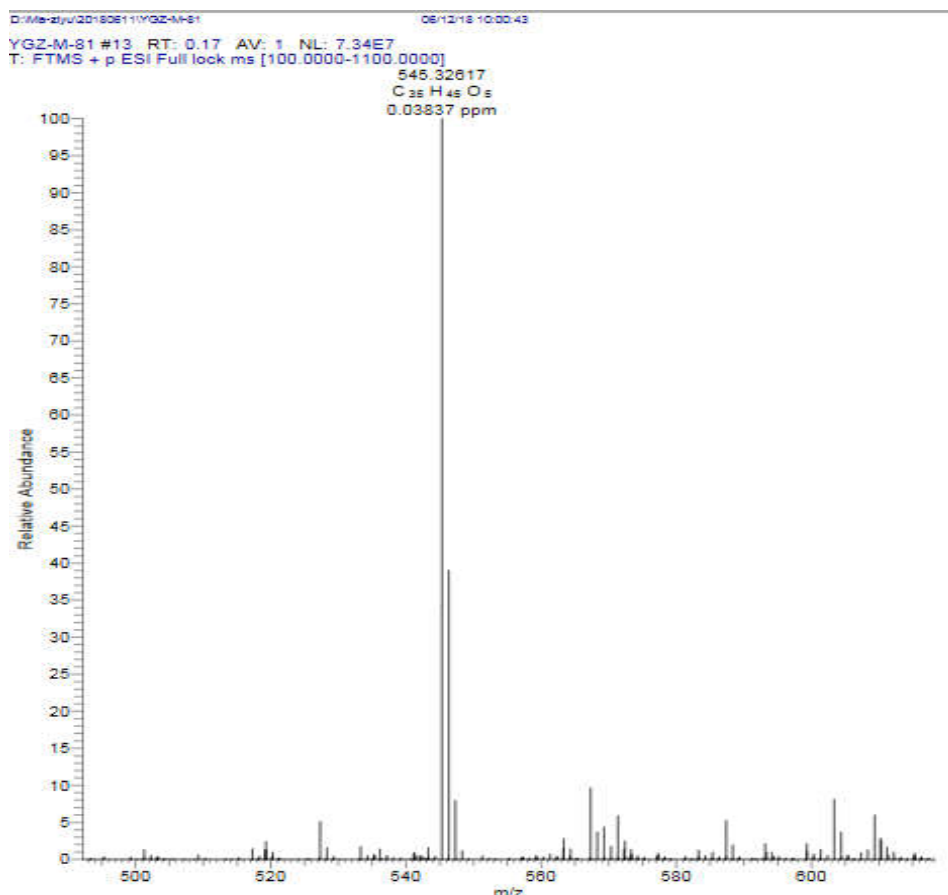

**Fig 40. HR-ESI-MS of 4**

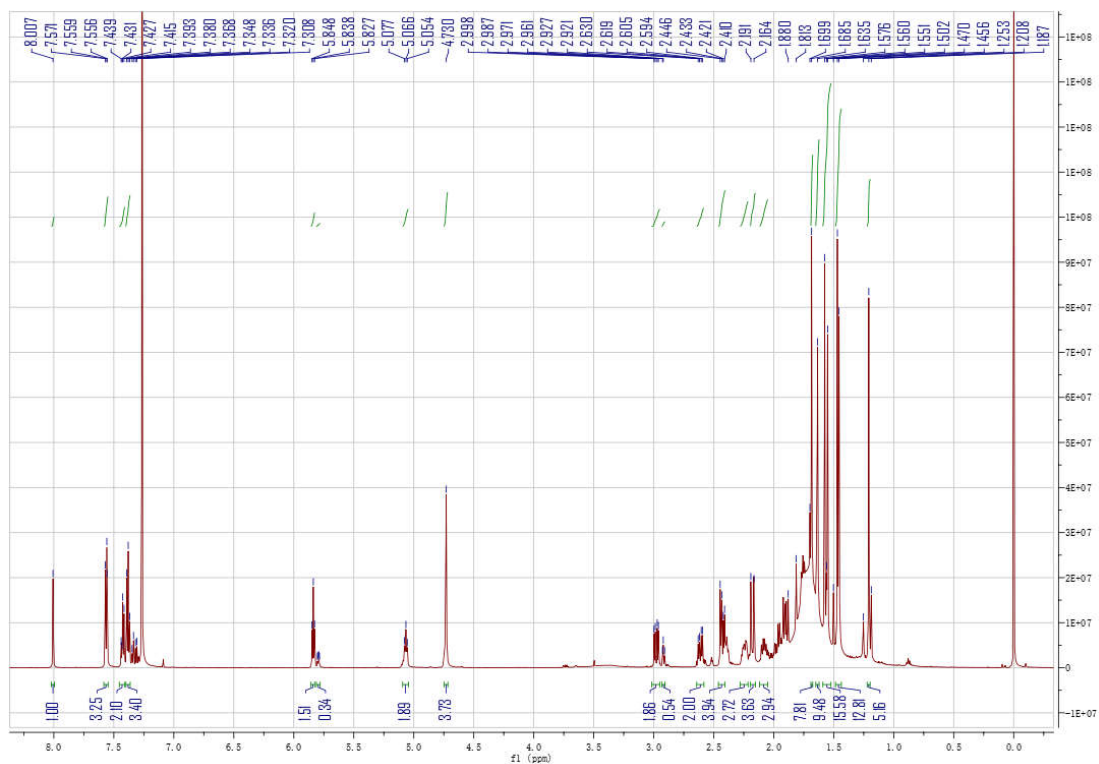

Fig 41. The  $^1\text{H}$ -NMR spectrum of 5 and 6

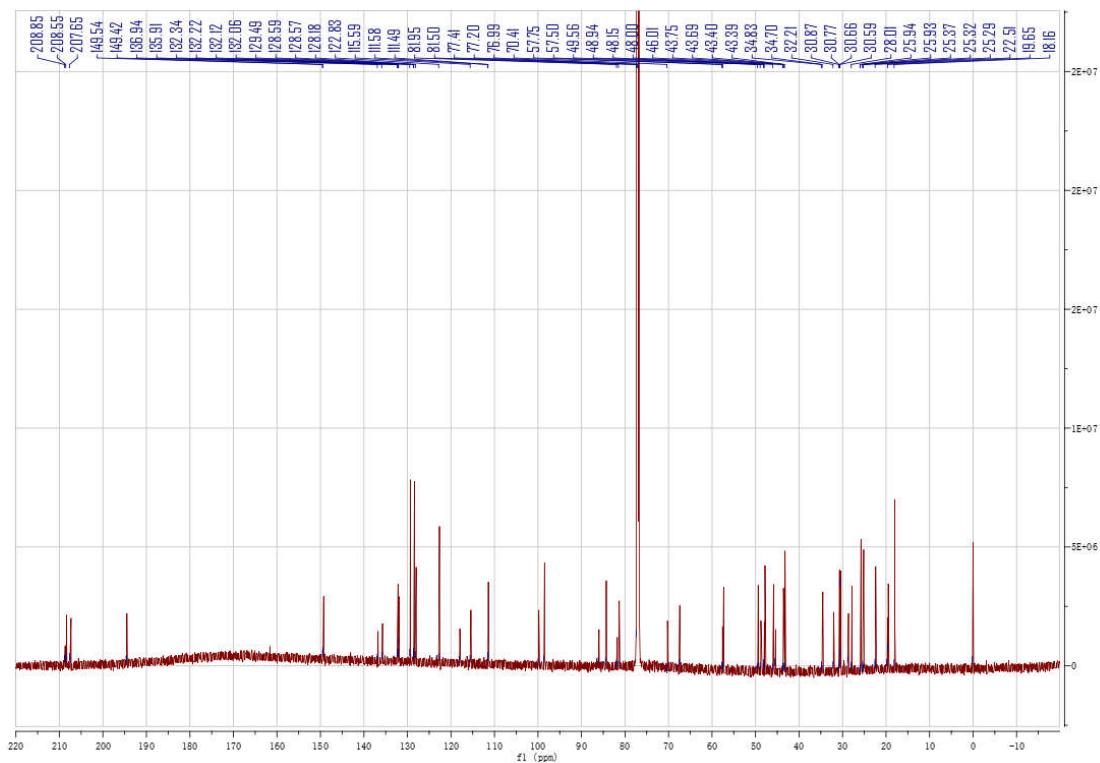

Fig 42. The  $^{13}\text{C}$ -NMR spectrum of 5 and 6

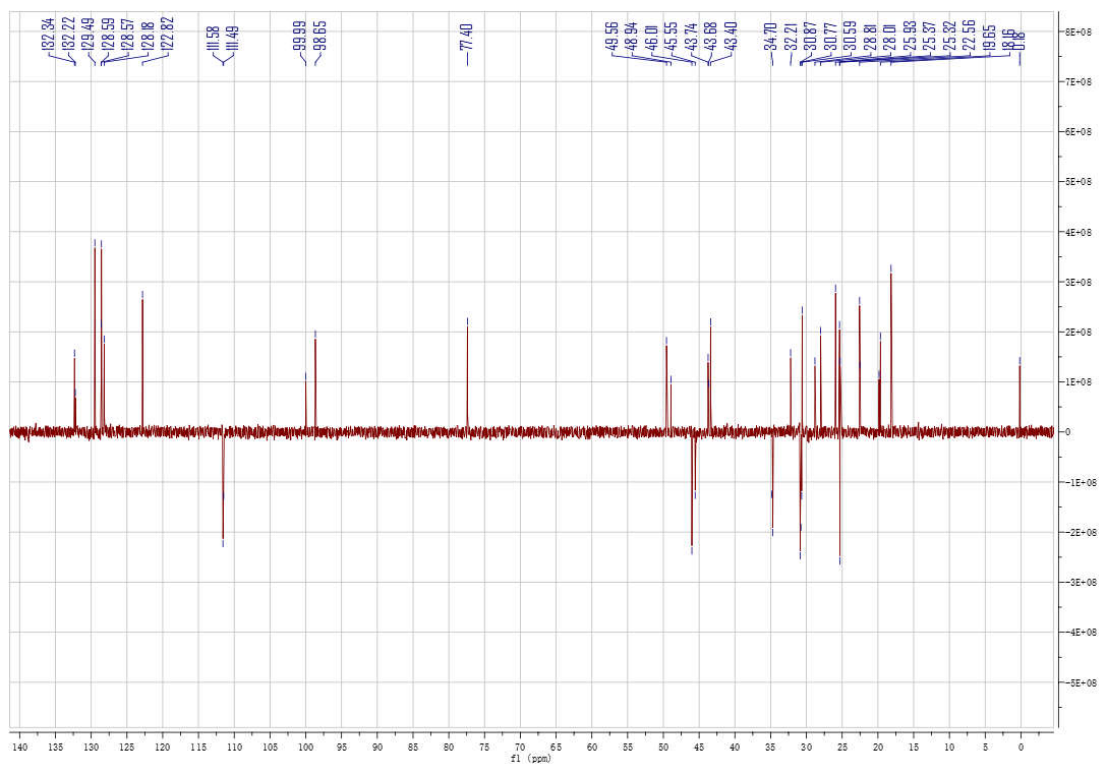

Fig 43.  $^{13}\text{C}$ -NMR-DEPT spectrum of 5 and 6

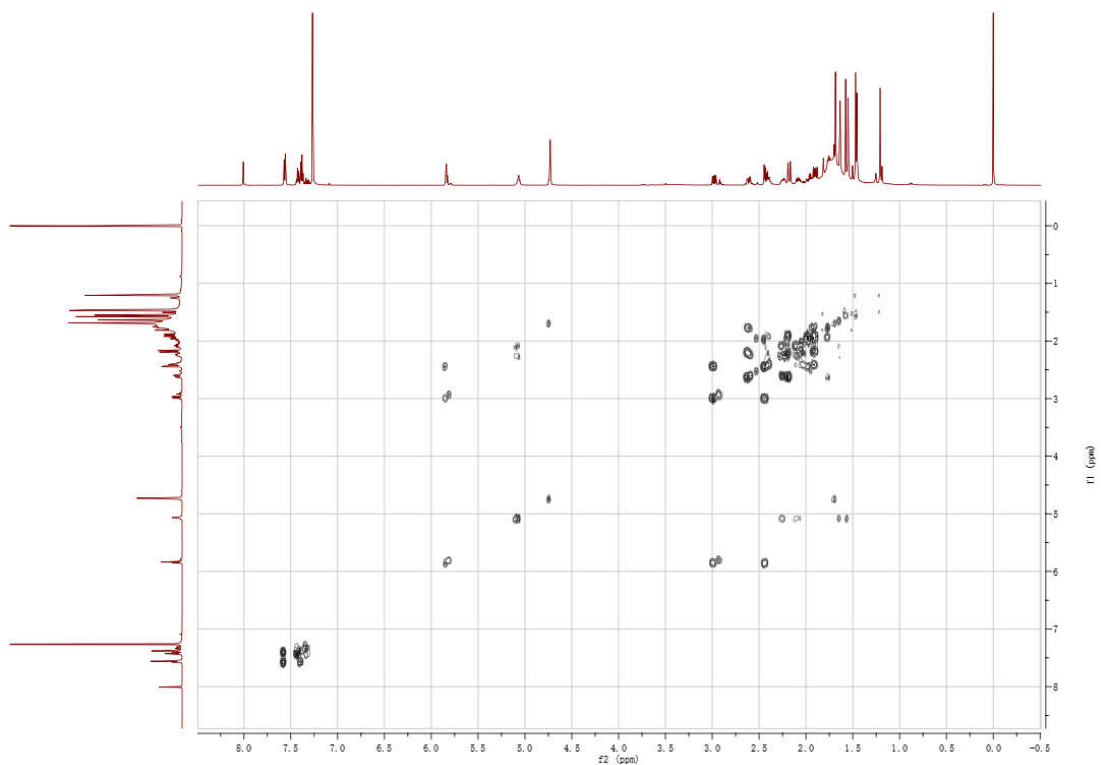

Fig 44.  $^1\text{H}$ - $^1\text{H}$  COSY spectrum of 5 and 6



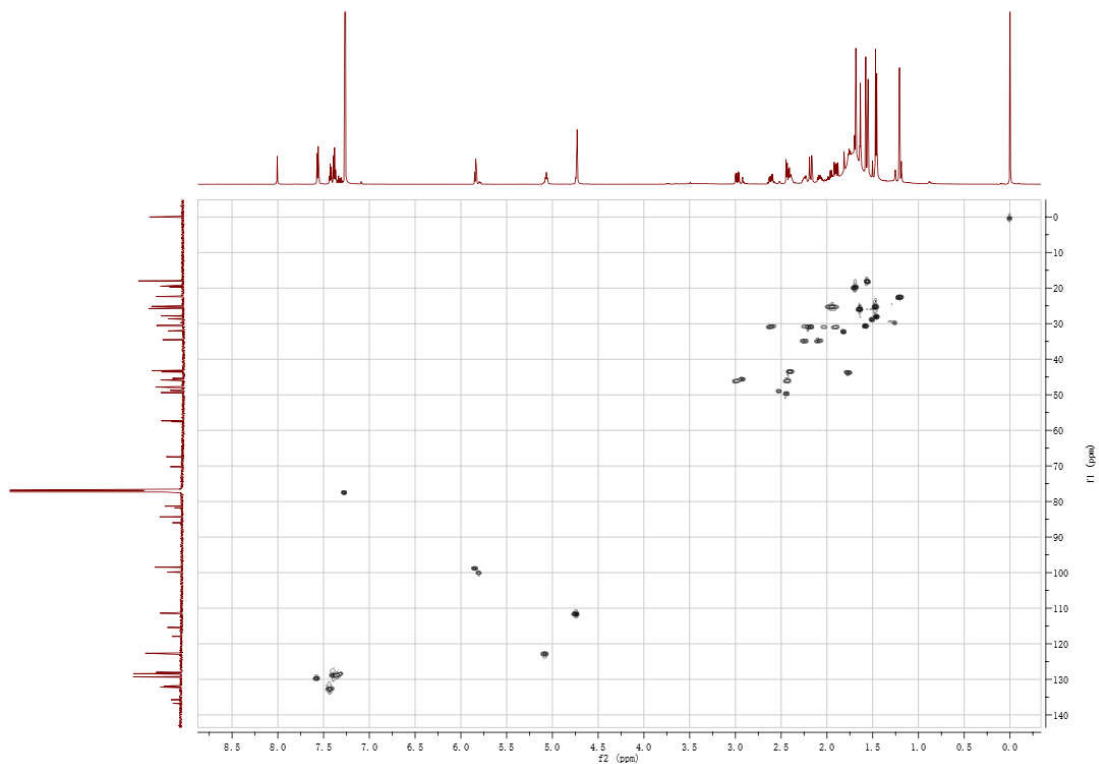

**Fig 45. HSQC spectrum of 5 and 6**

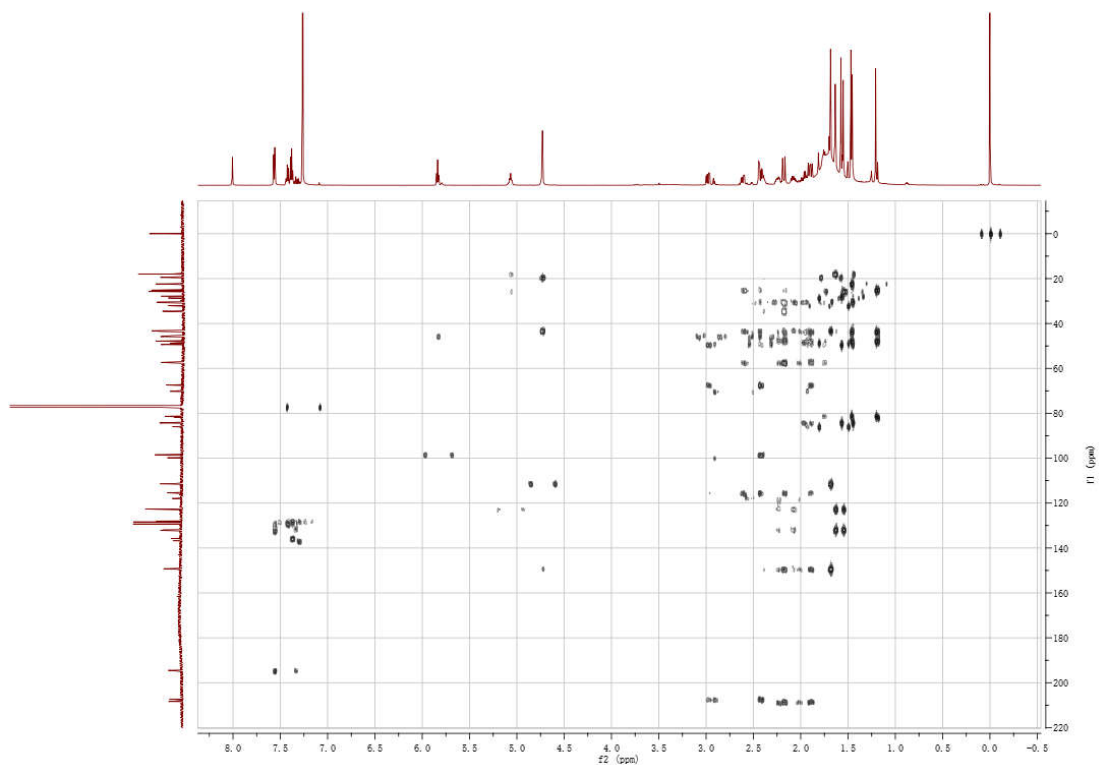

**Fig 46. HMBC spectrum of 5 and 6**

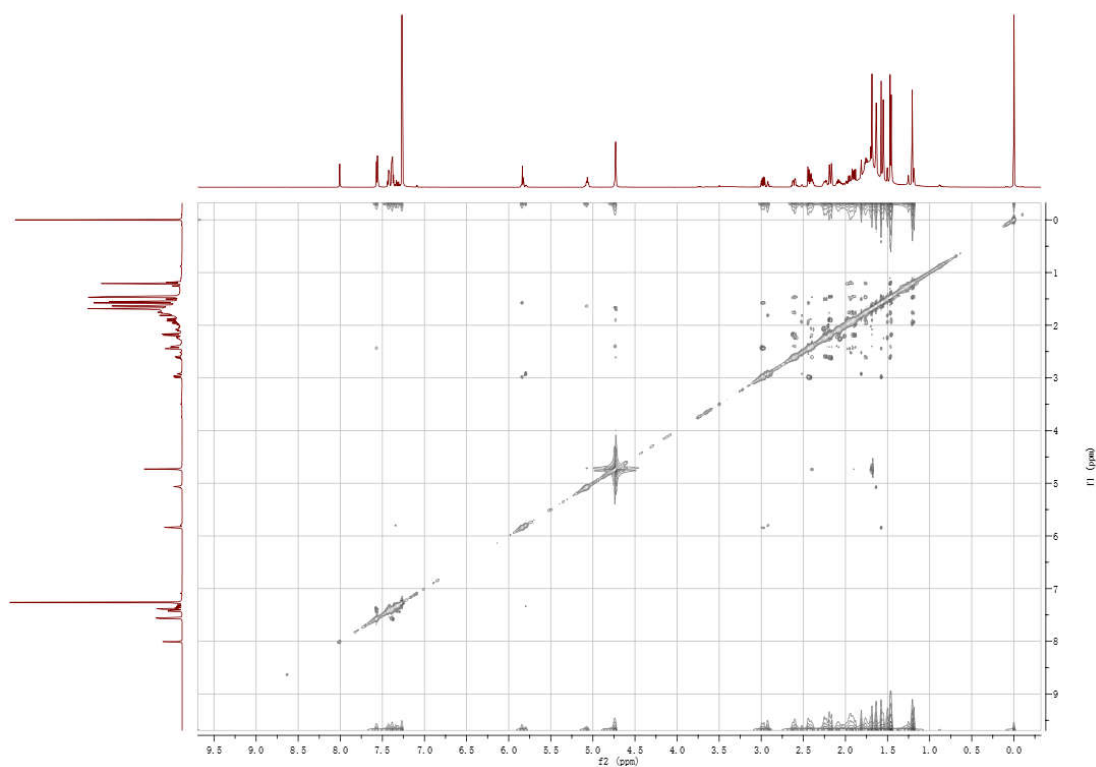

**Fig 47. ROESY spectrum of 5 and 6**

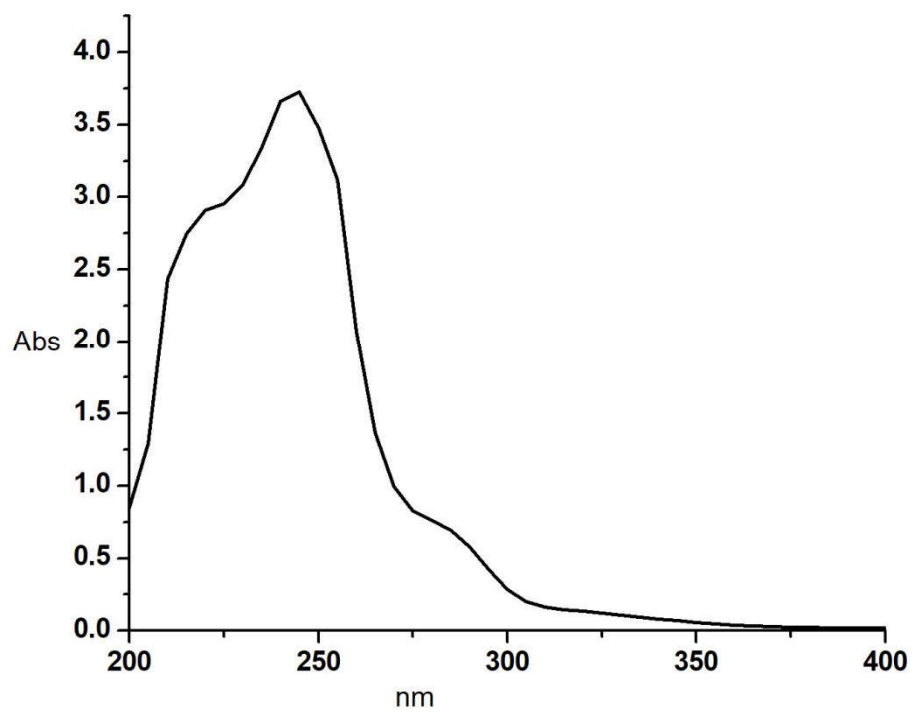

**Fig 48. UV spectrum of 5 and 6**

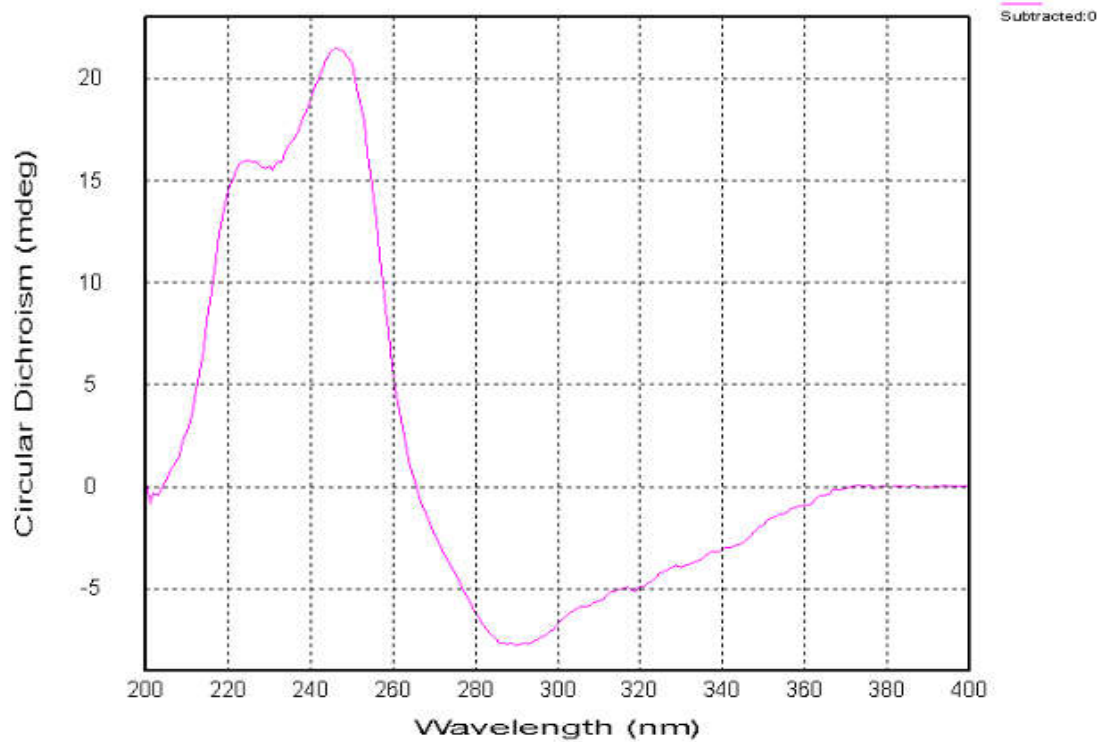

Fig 49. CD spectrum of 5 and 6

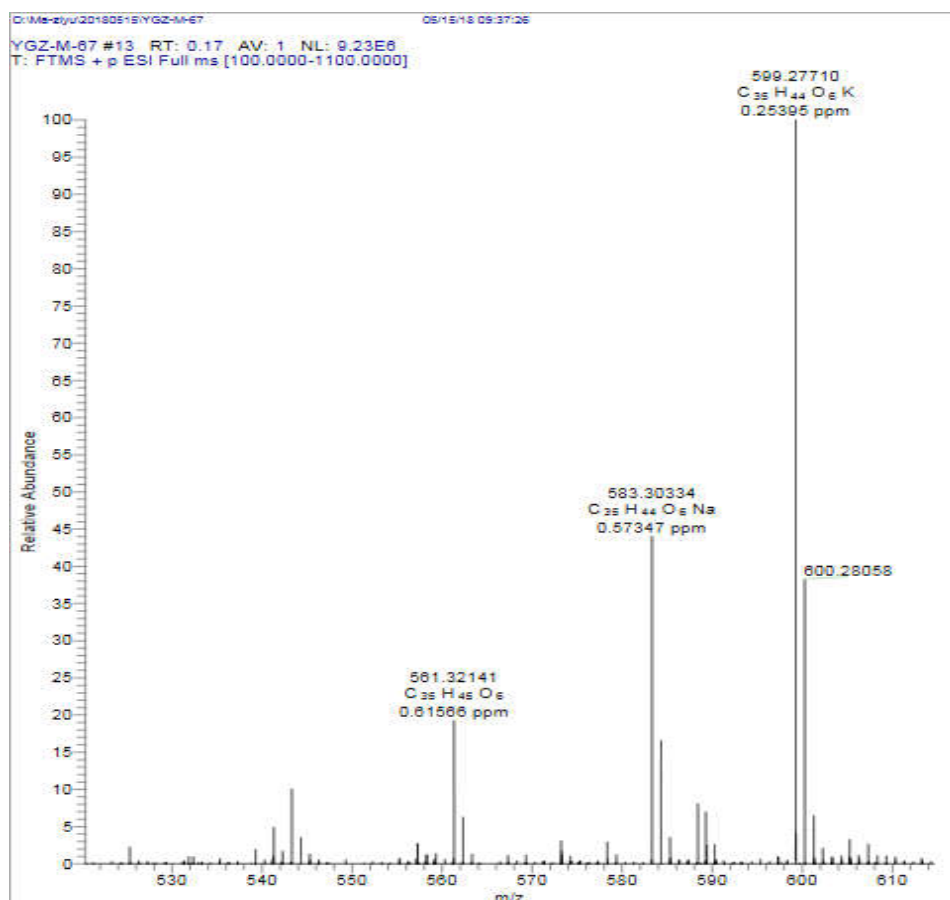

Fig 50. HR-ESI-MS of 5 and 6

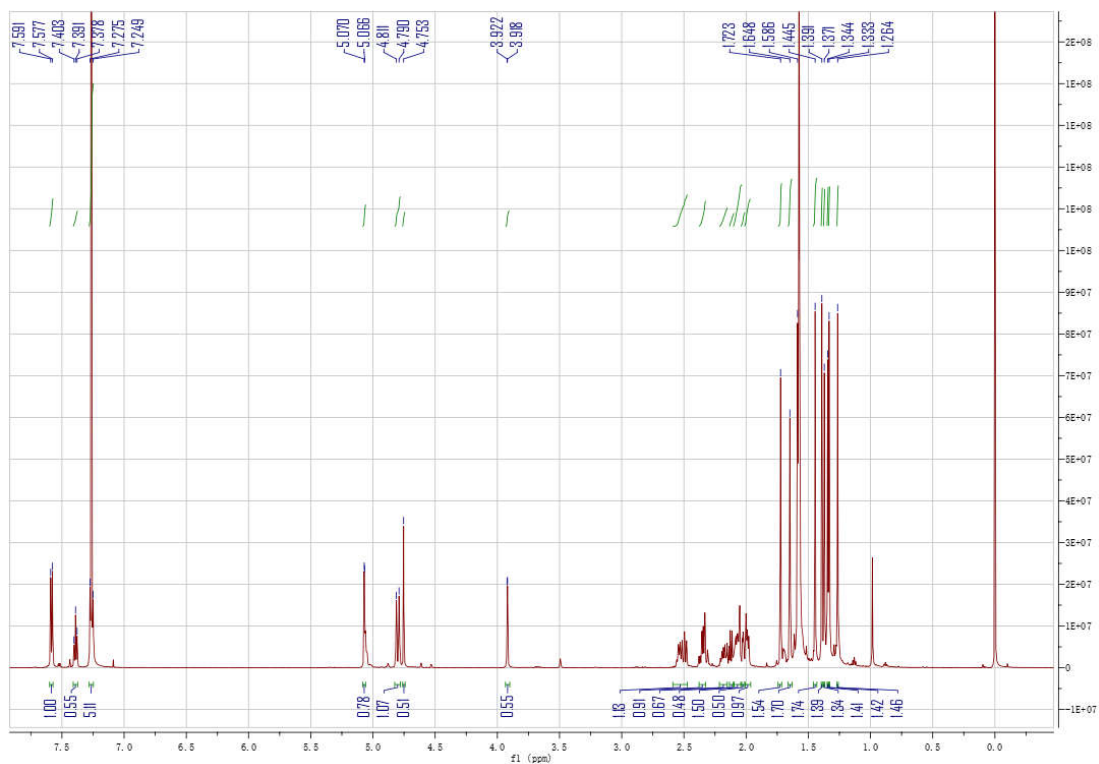

Fig 51. The  $^1\text{H}$ -NMR spectrum of 7

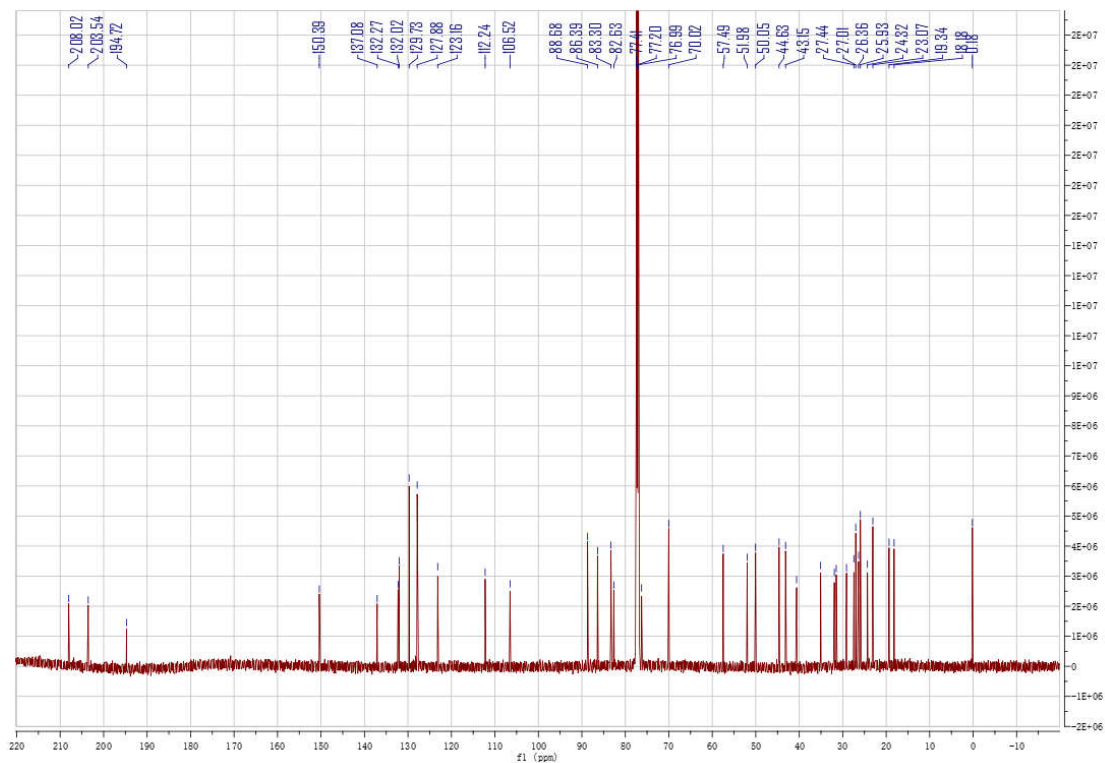

Fig 52. The  $^{13}\text{C}$ -NMR spectrum of 7

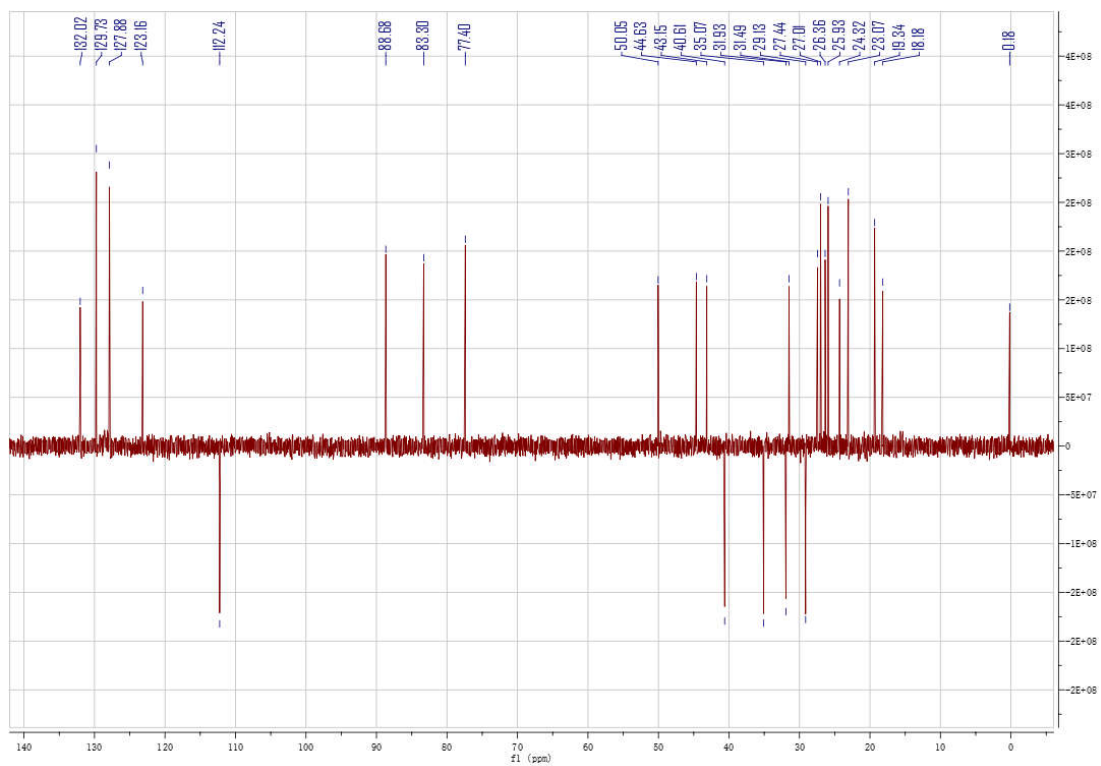

Fig 53.  $^{13}\text{C}$ -NMR-DEPT spectrum of 7

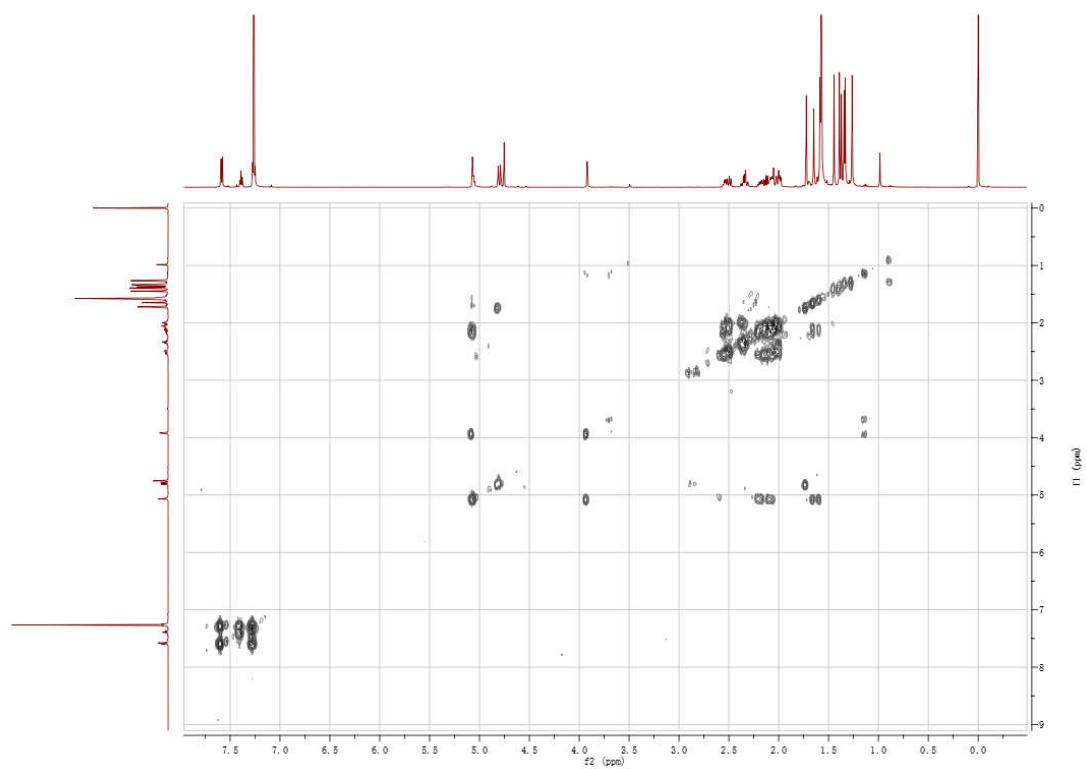

Fig 54.  $^1\text{H}$ - $^1\text{H}$  COSY spectrum of 7

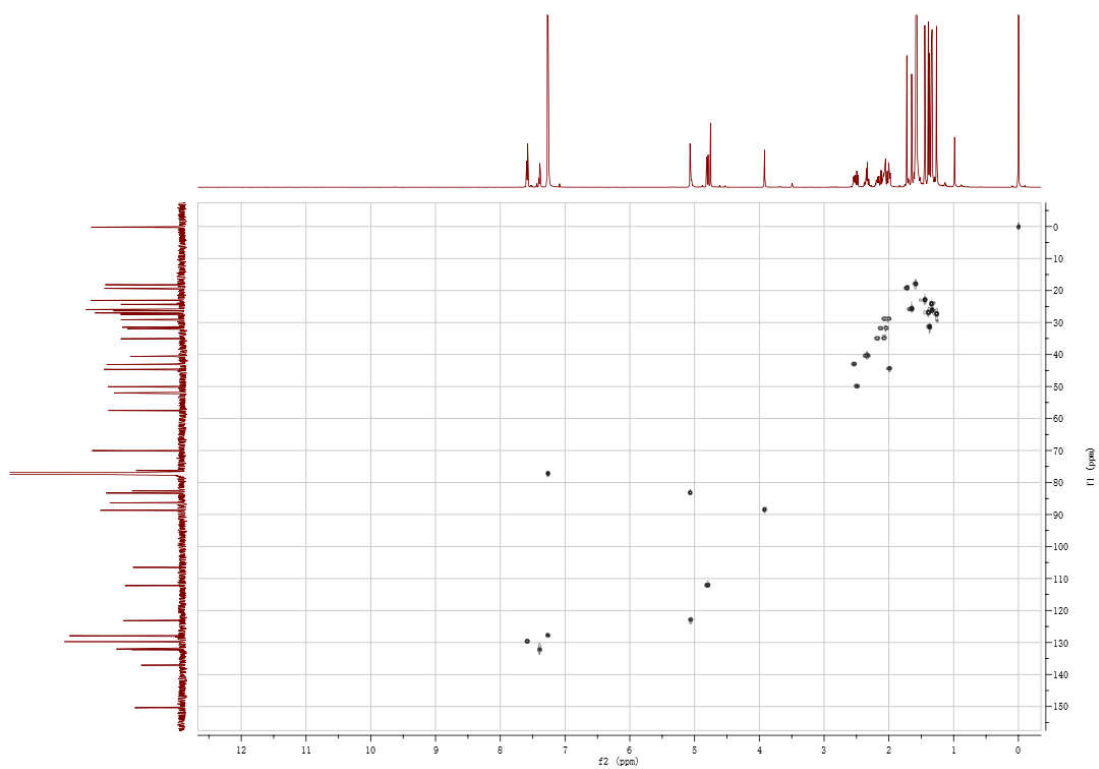

**Fig 55. HSQC spectrum of 7**

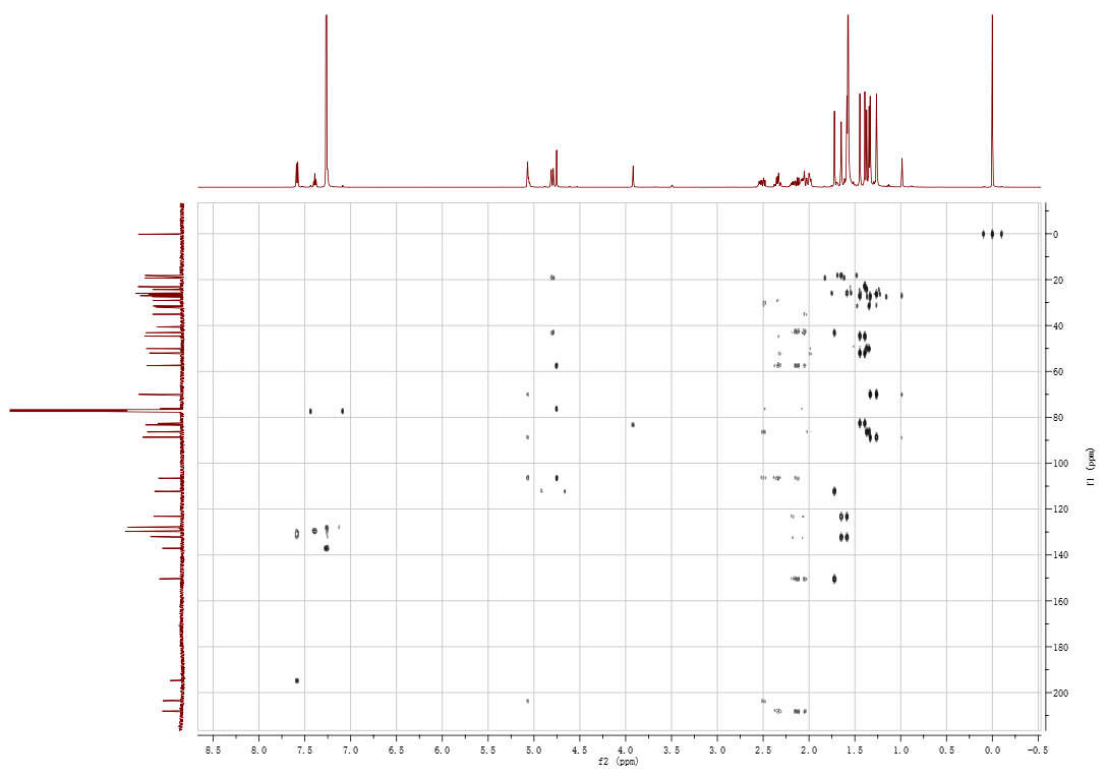

**Fig 56. HMBC spectrum of 7**

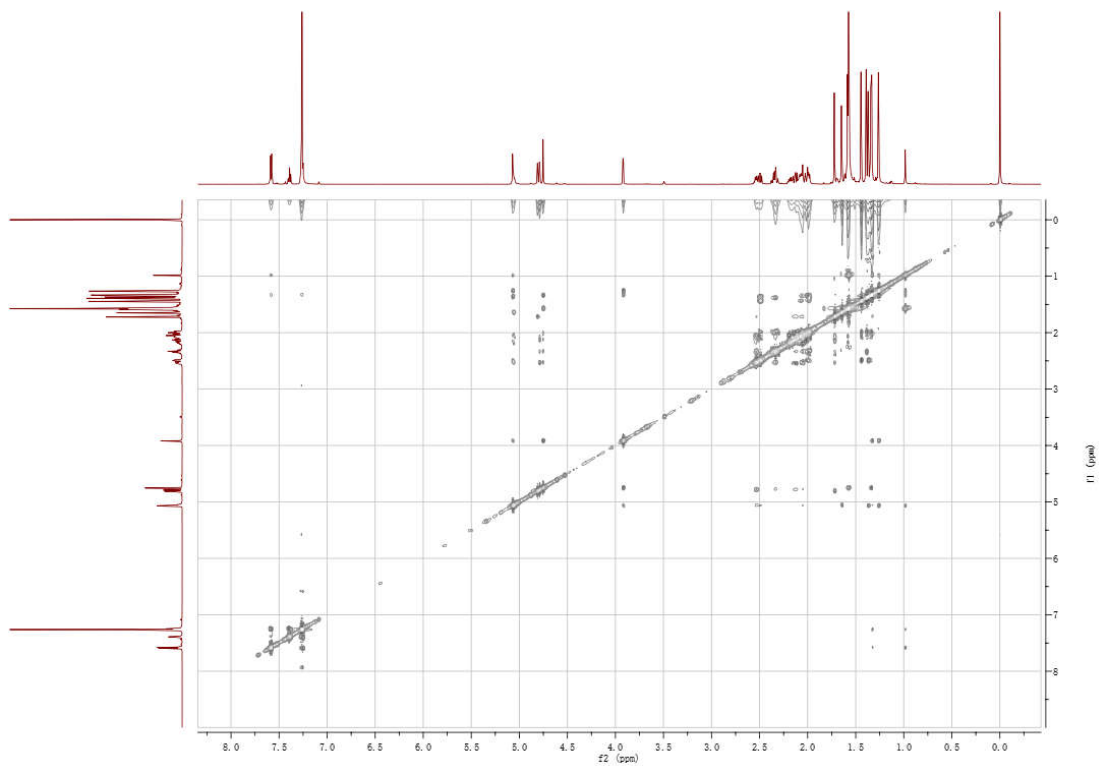

**Fig 57. ROESY spectrum of 7**

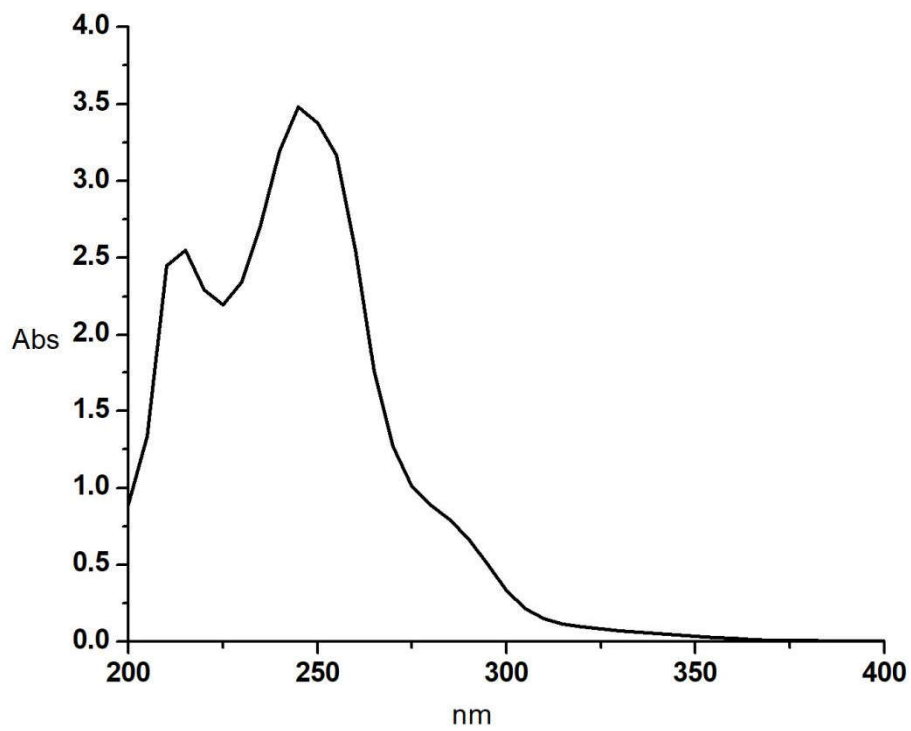

**Fig 58. UV spectrum of 7**

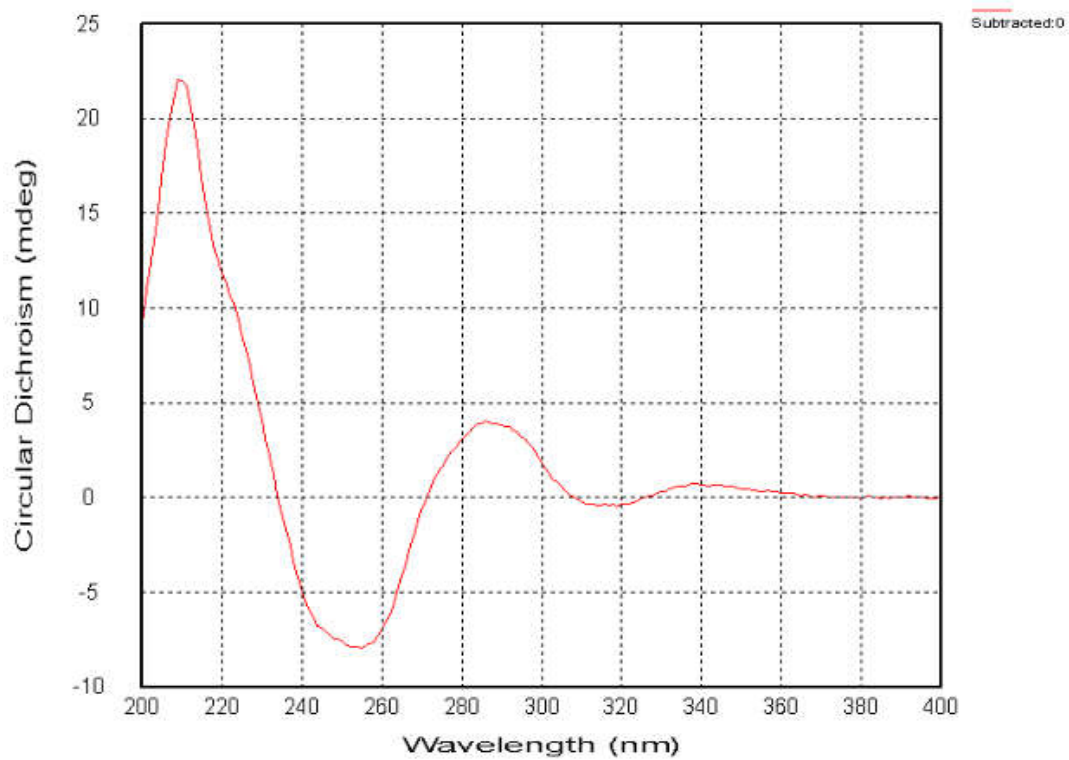

**Fig 59. CD spectrum of 7**

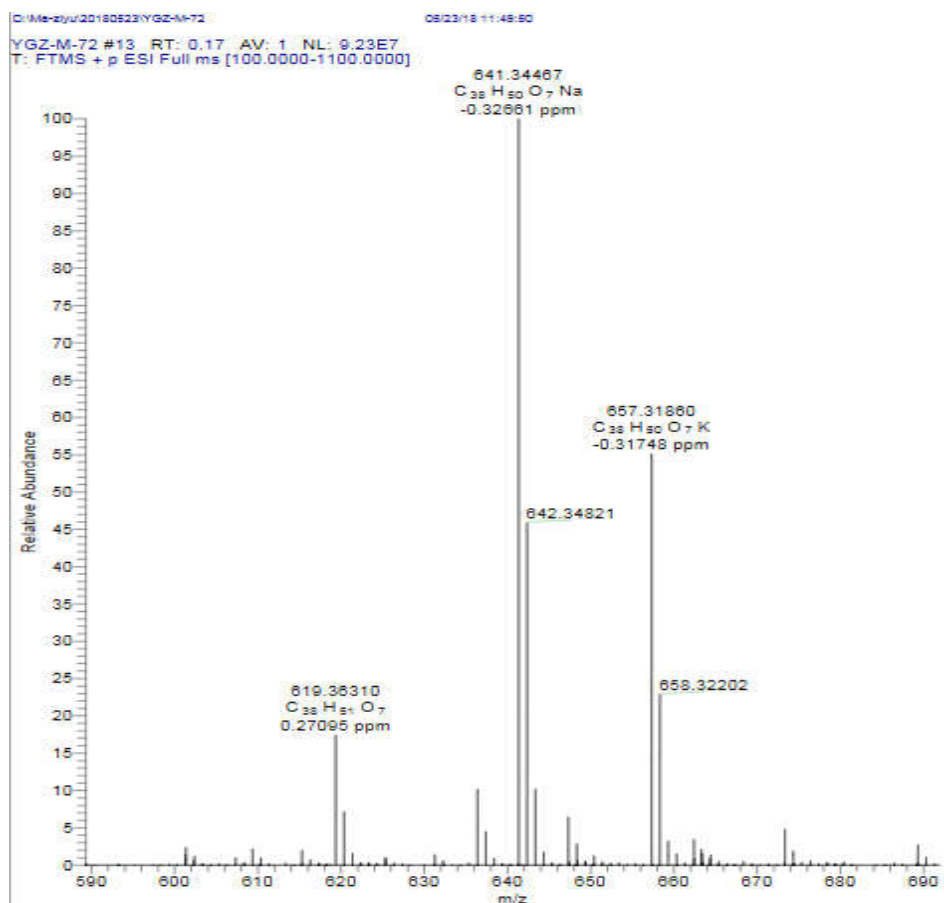

**Fig 60. HR-ESI-MS of 7**



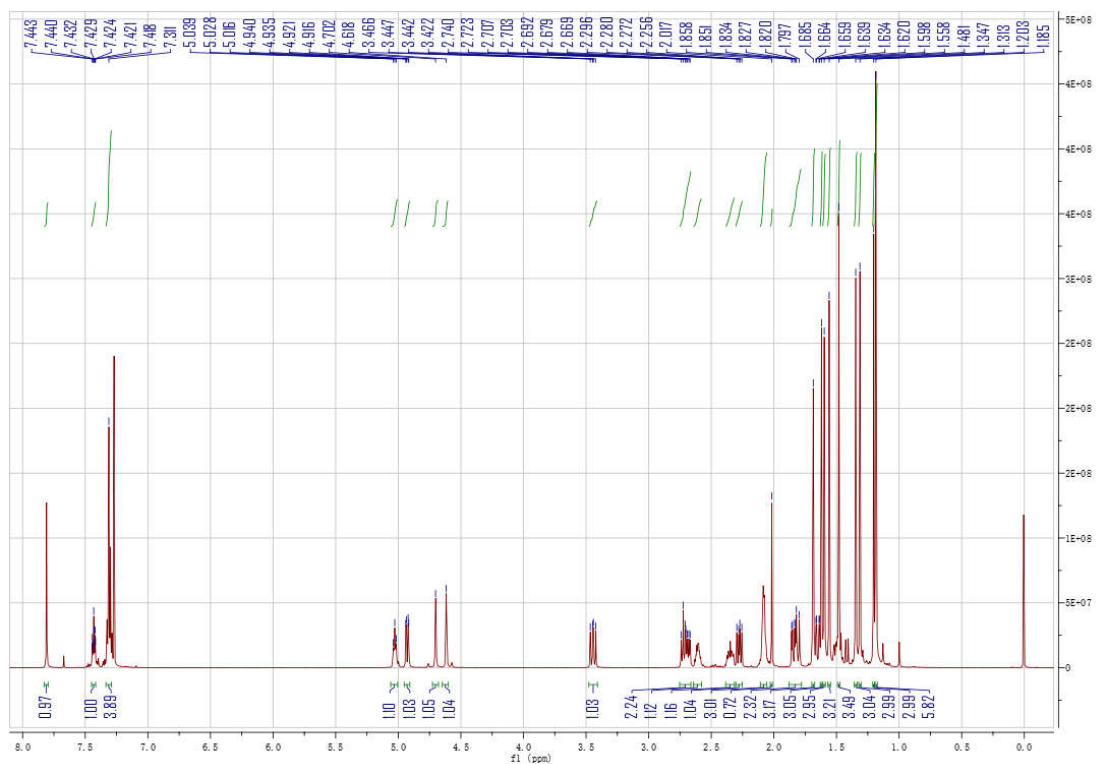

Fig 61. The  $^1\text{H}$ -NMR spectrum of 8

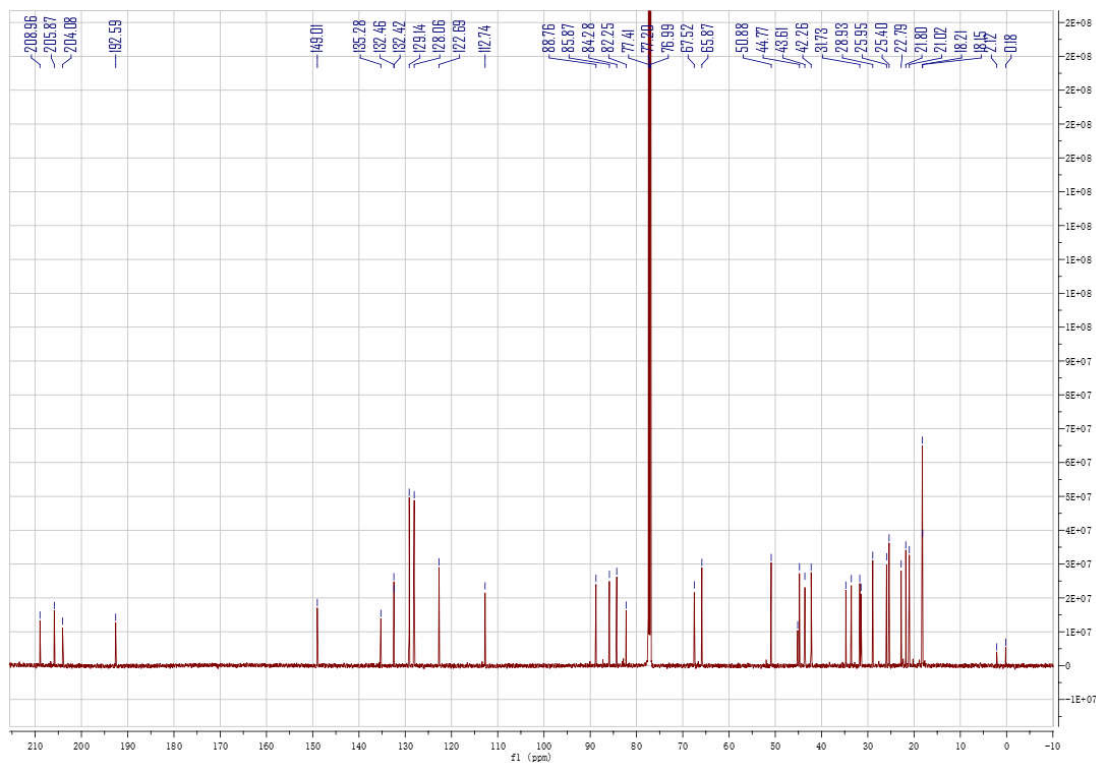

Fig 62. The  $^{13}\text{C}$ -NMR spectrum of 8

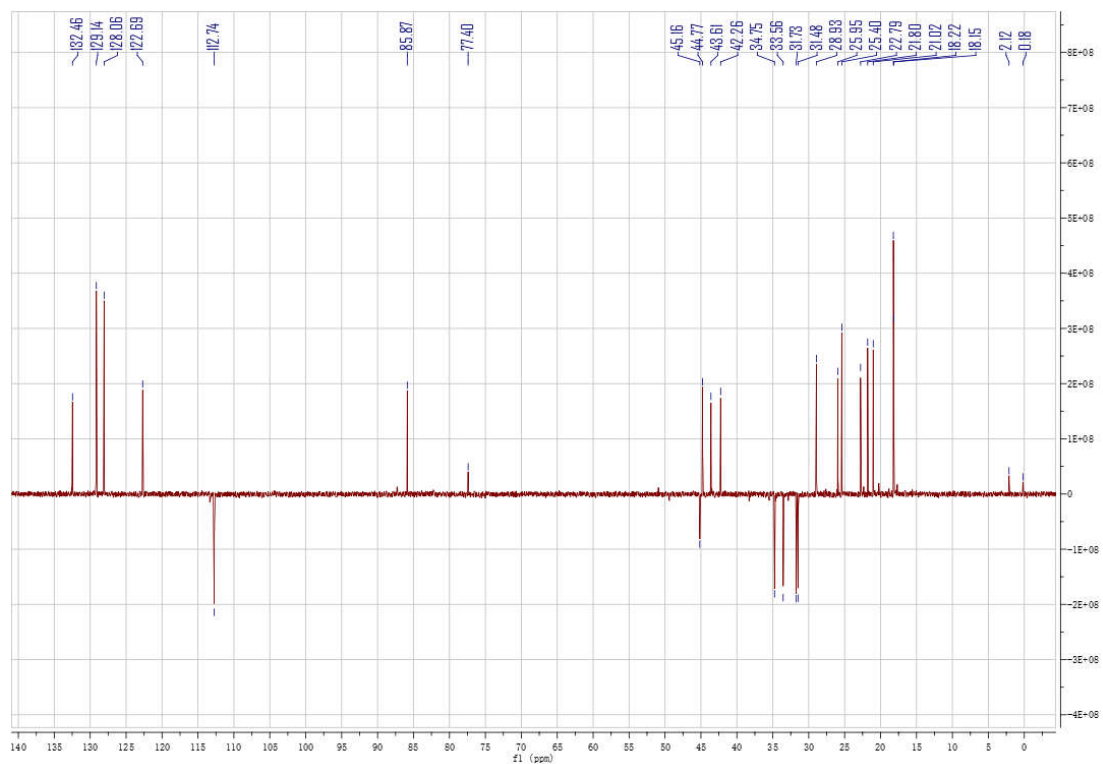

Fig 63.  $^{13}\text{C}$ -NMR-DEPT spectrum of 8

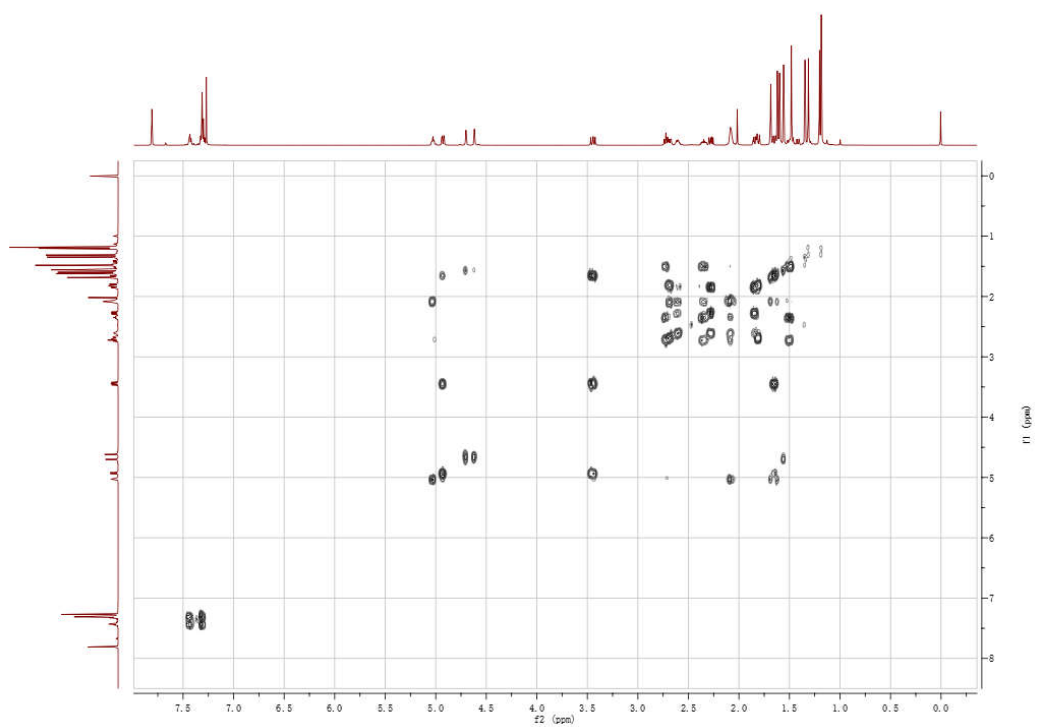

Fig 64.  $^1\text{H}$ - $^1\text{H}$  COSY spectrum of 8

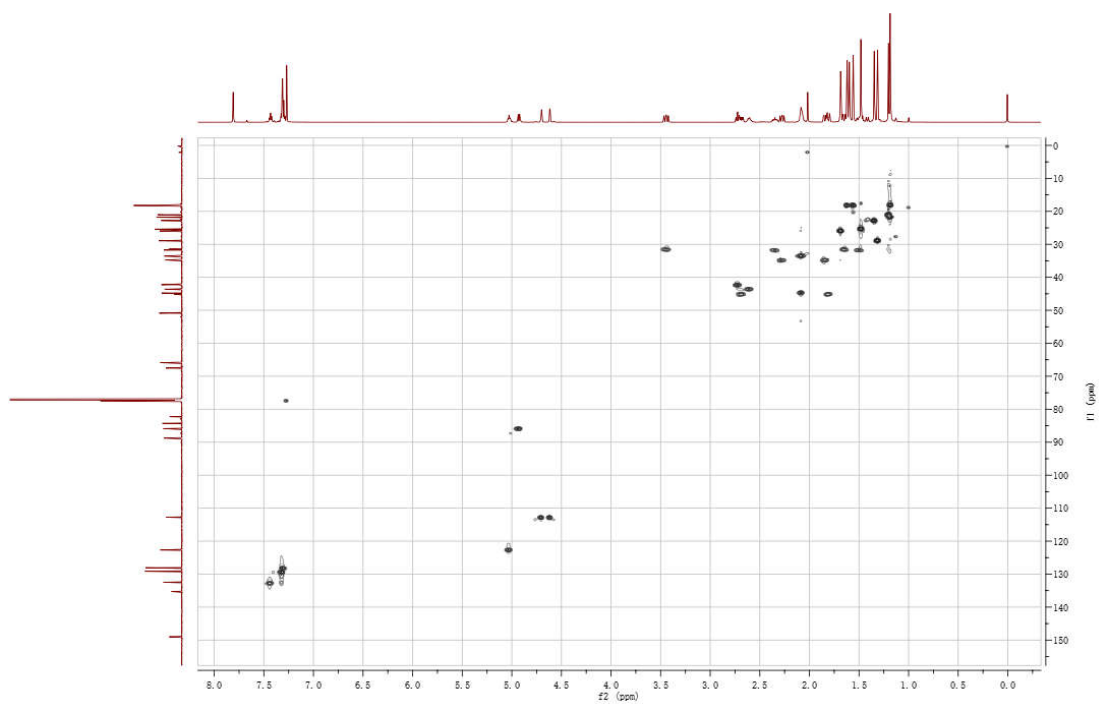

**Fig 65. HSQC spectrum of 8**

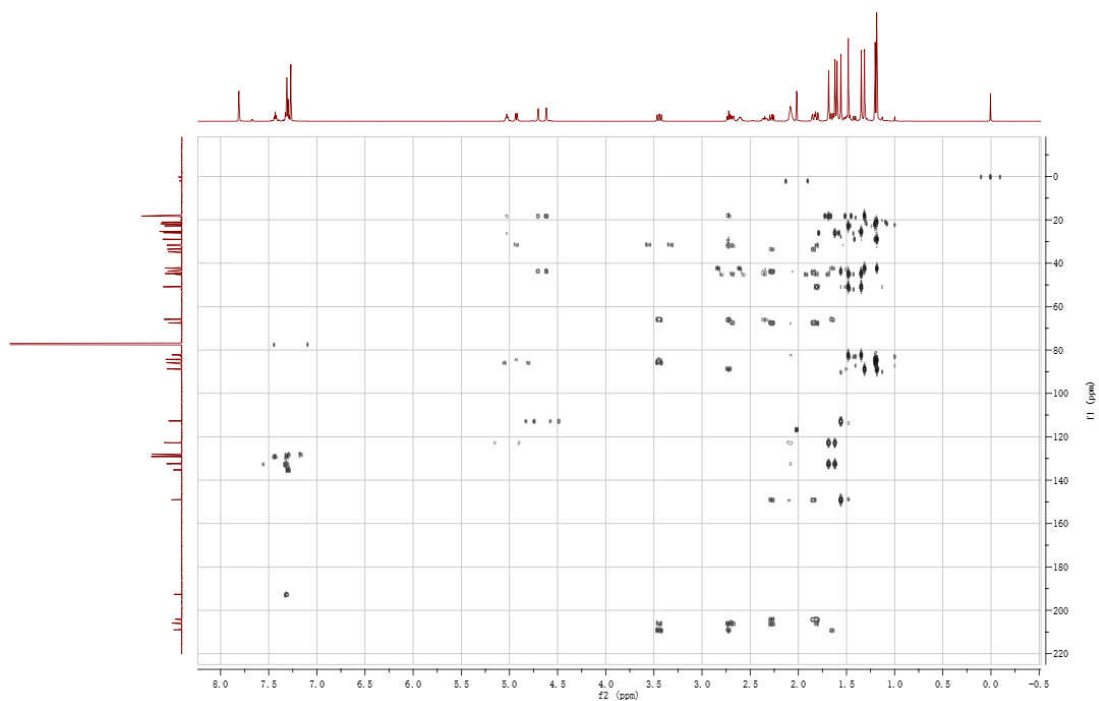

**Fig 66. HMBC spectrum of 8**

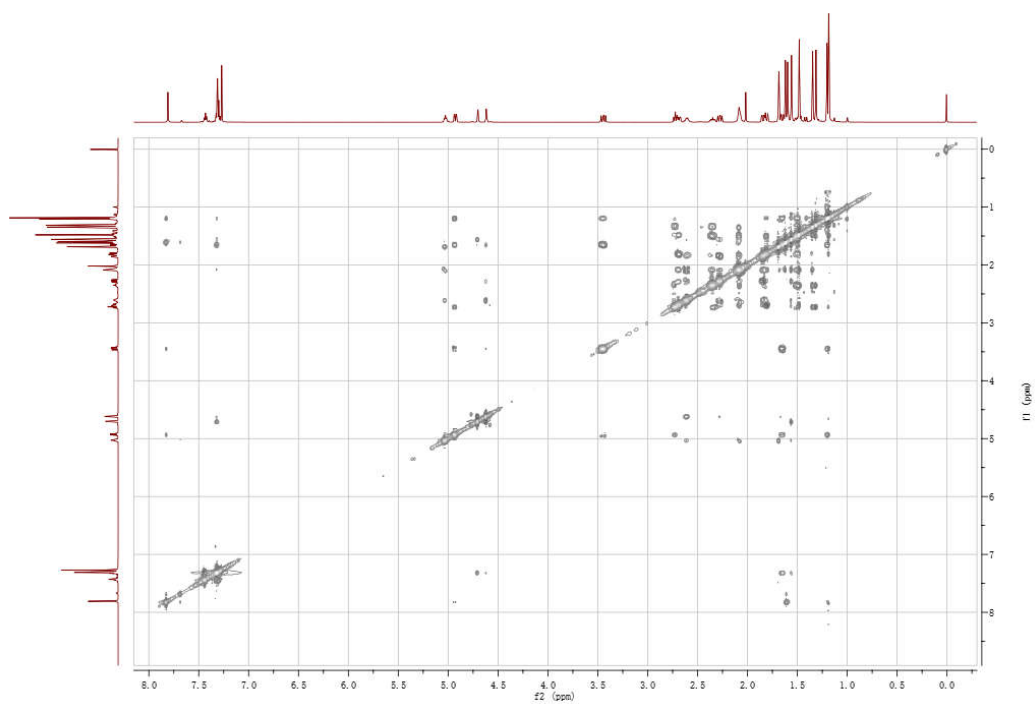

**Fig 67. ROESY spectrum of 8**

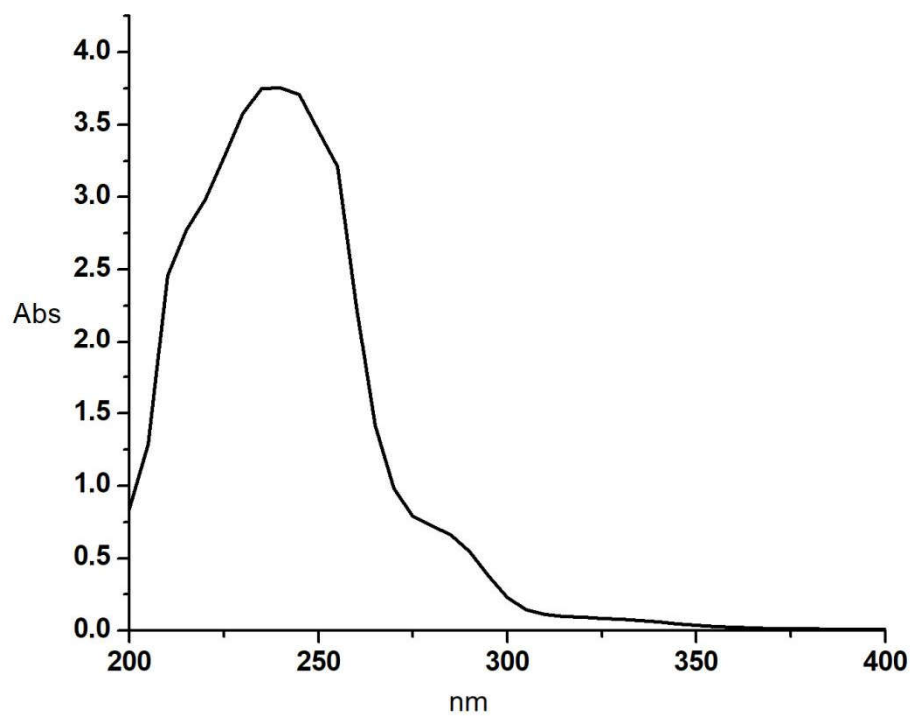

**Fig 68. UV spectrum of 8**

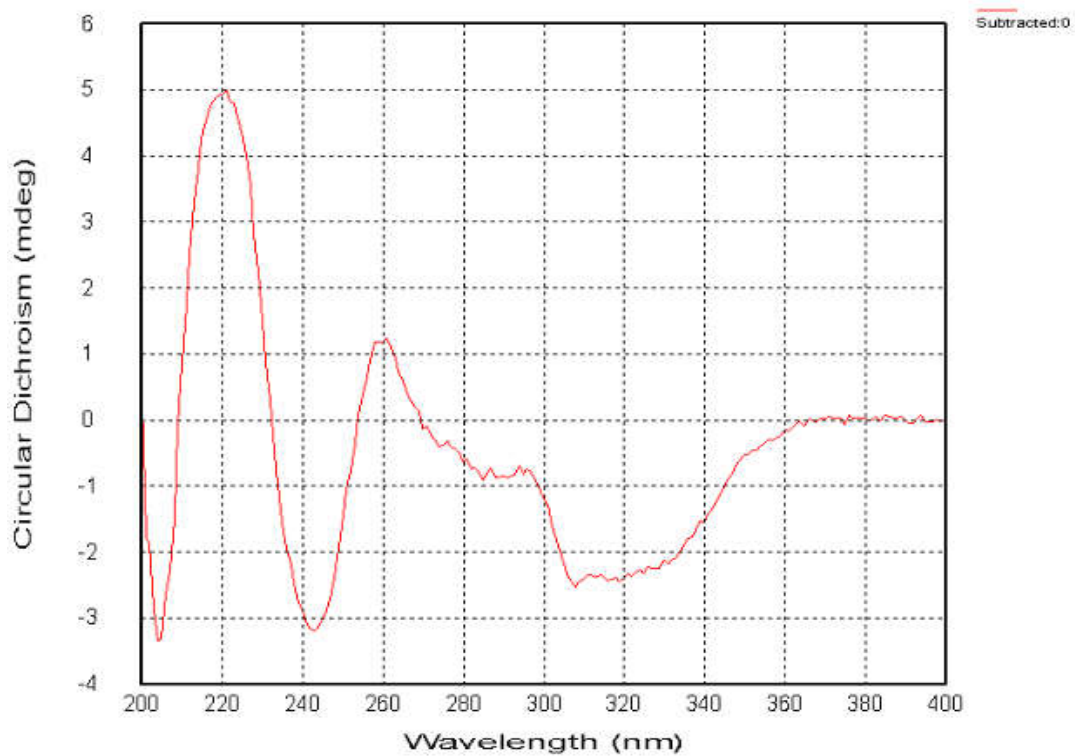

**Fig 69. CD spectrum of 8**

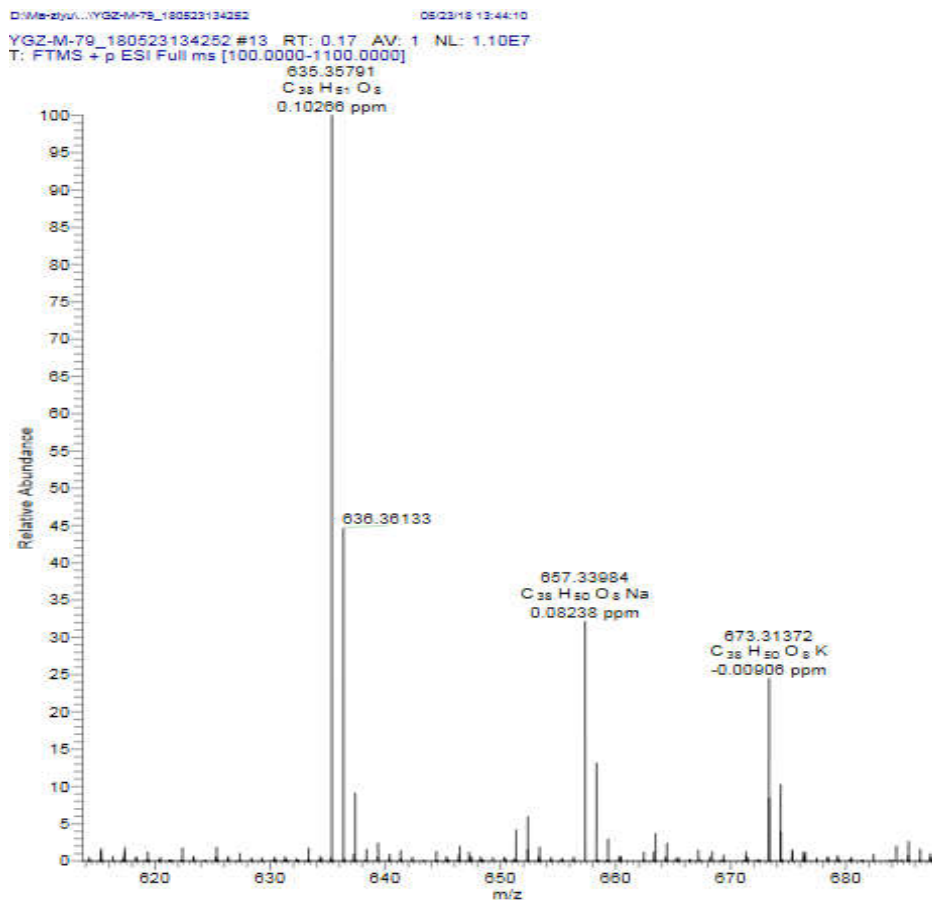

**Fig 70. HR-ESI-MS of 8**

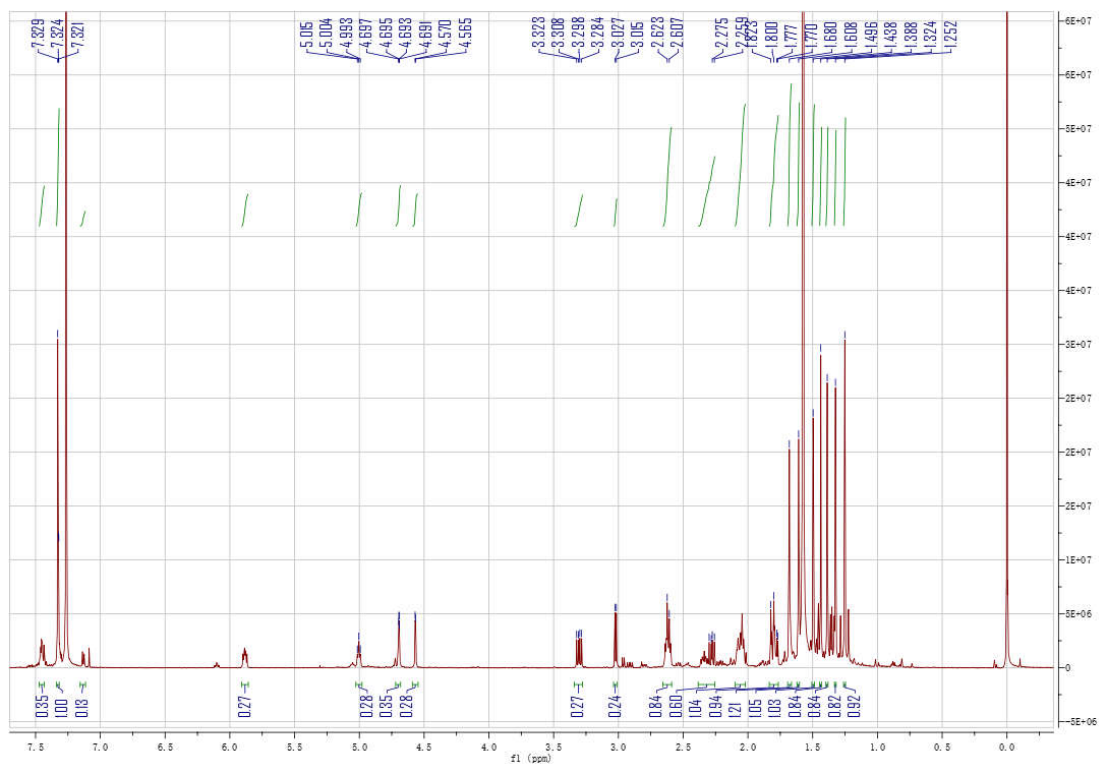

Fig 71. The  $^1\text{H}$ -NMR spectrum of 9

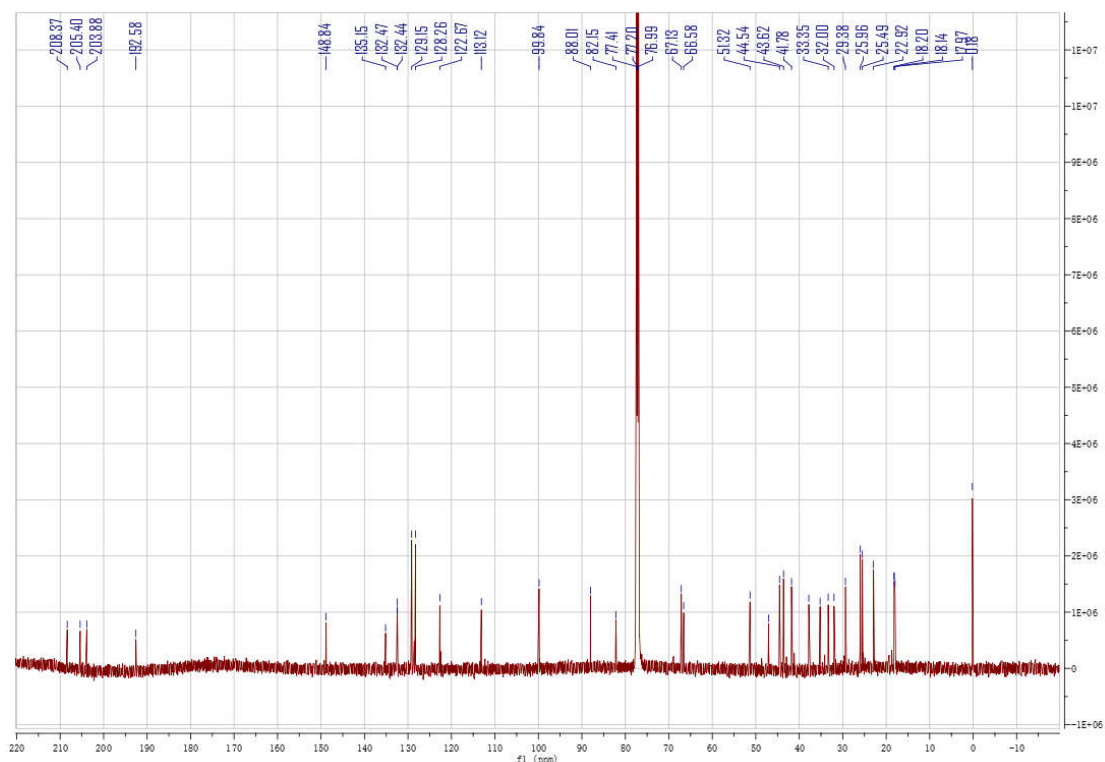

Fig 72. The  $^{13}\text{C}$ -NMR spectrum of 9

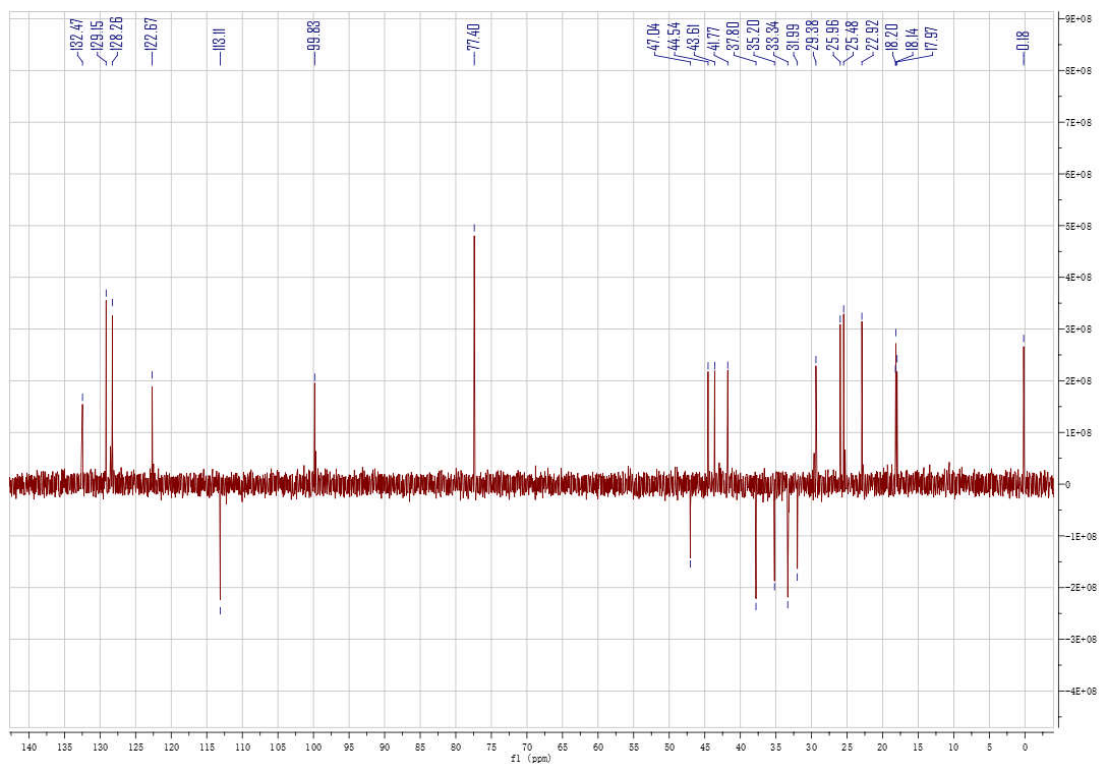

Fig 73.  $^{13}\text{C}$ -NMR-DEPT spectrum of 9

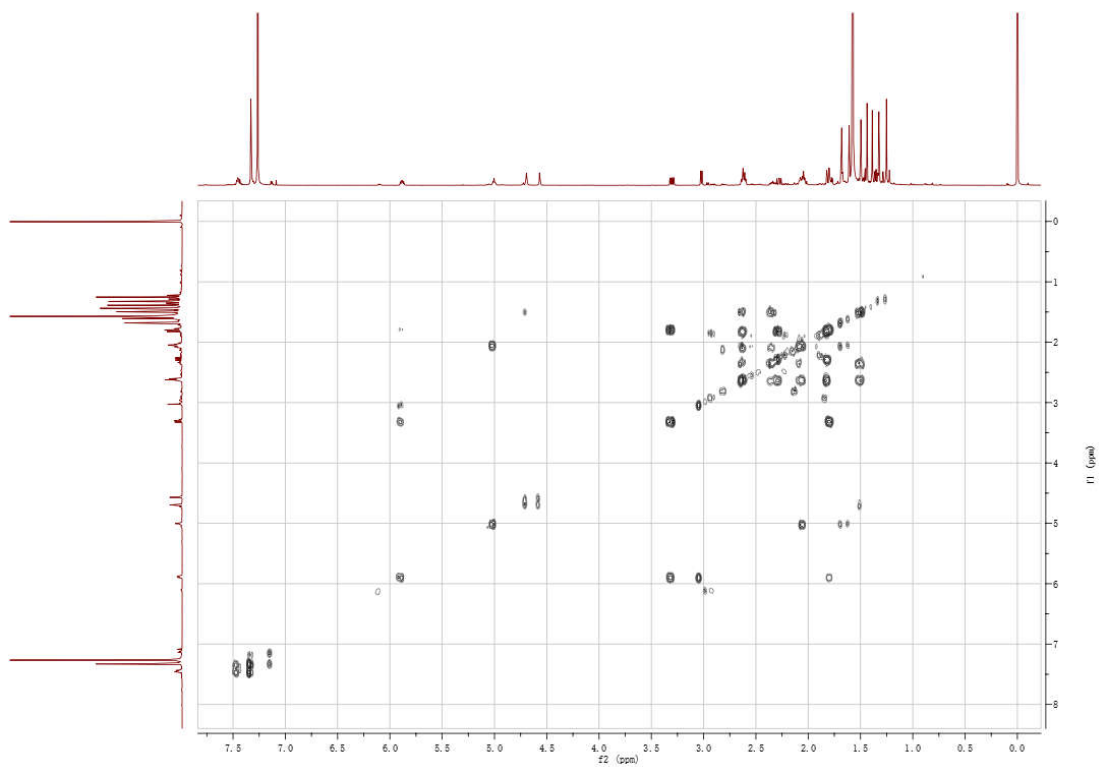

Fig 74.  $^1\text{H}$ - $^1\text{H}$  COSY spectrum of 9

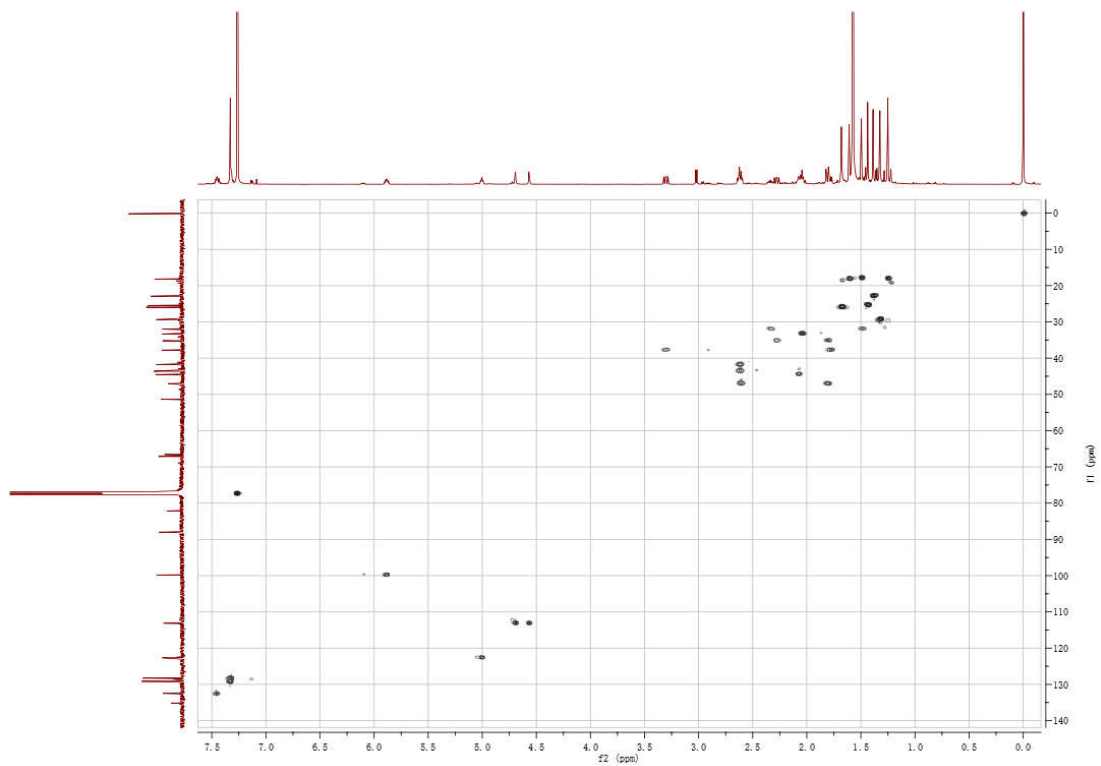

**Fig 75. HSQC spectrum of 9**

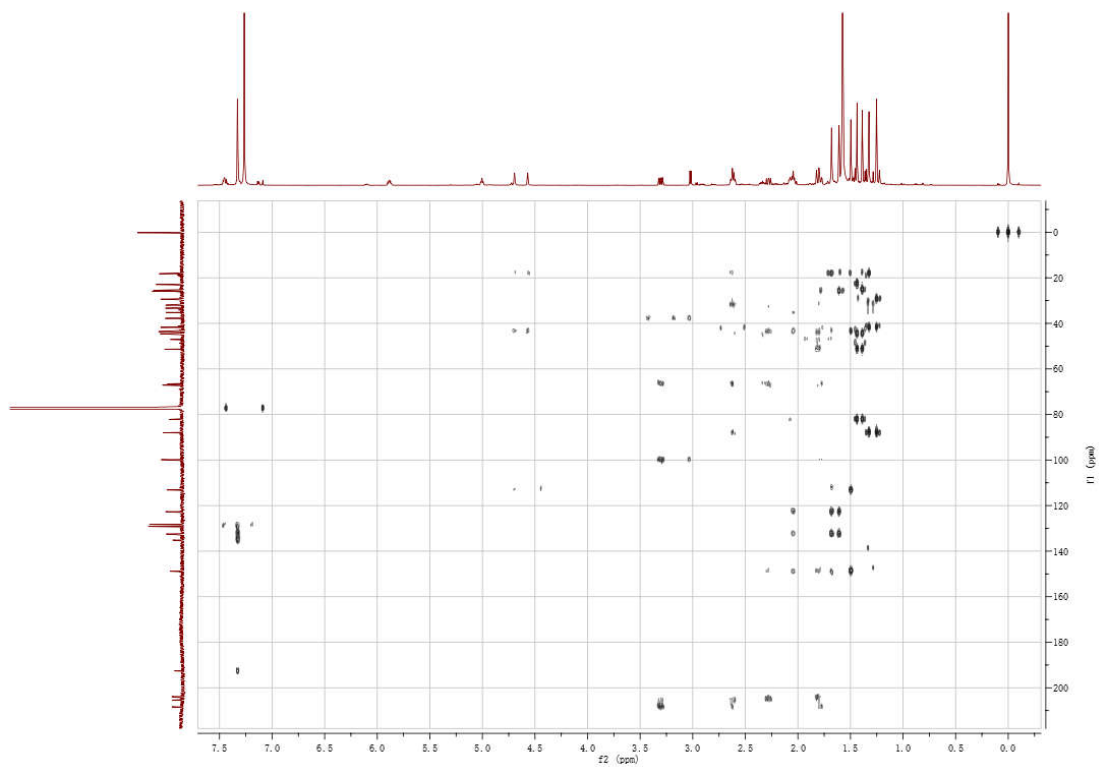

**Fig 76. HMBC spectrum of 9**



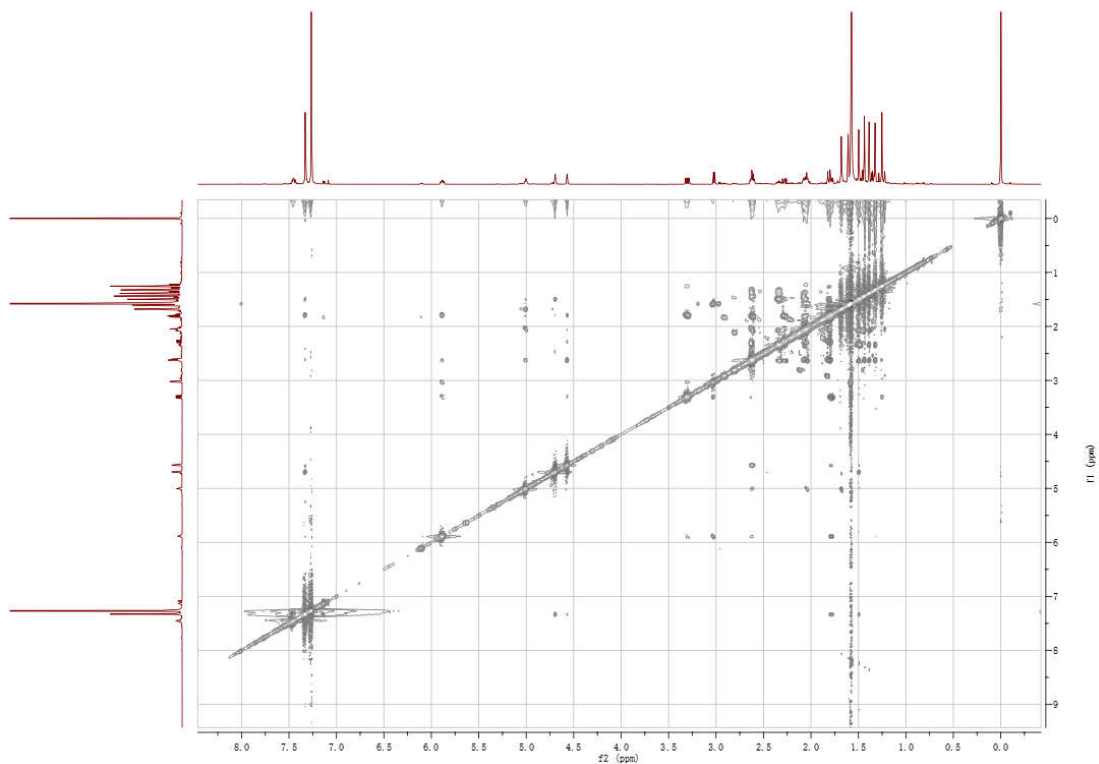

**Fig 77. ROESY spectrum of 9**

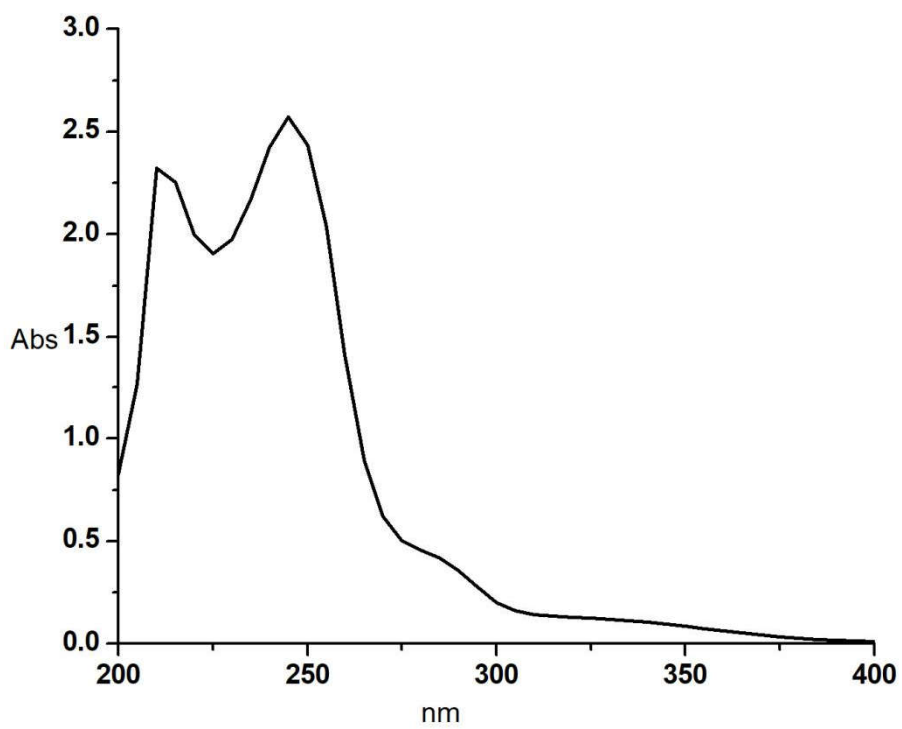

**Fig 78. UV spectrum of 9**

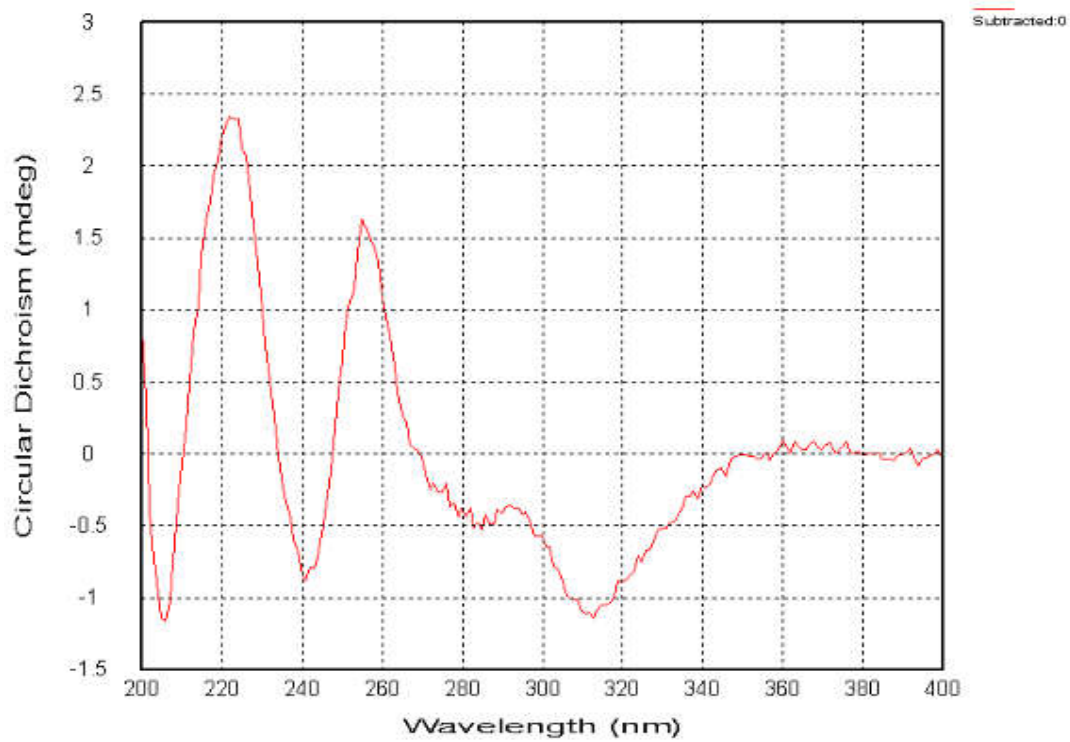

**Fig 79. CD spectrum of 9**

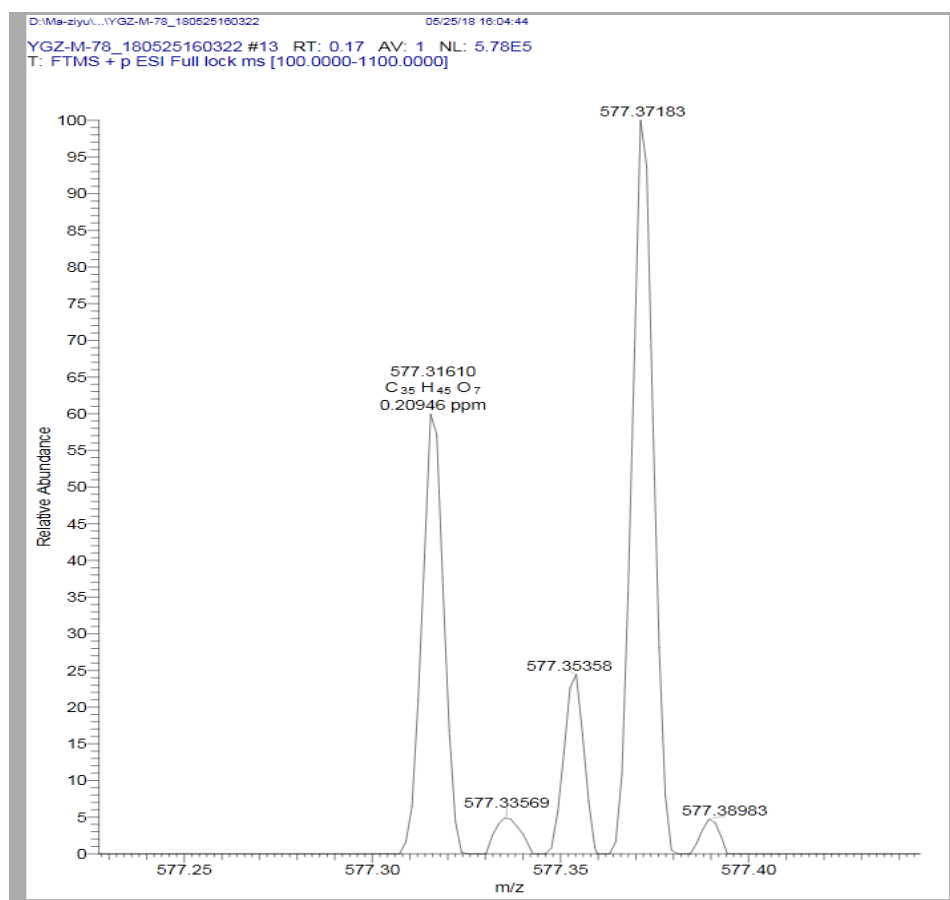

**Fig 80. HR-ESI-MS of 9**
